# Supplementary material
Source: MDPI journal article supplement (https://www.mdpi.com/2410-3888/7/3/98)
Supplement: s1 [file s1]

Archive with 2 entries (2 files):
- Table S1 The information of total reads and passed reads used in this study.pdf
- Table S2 GO enrichment analysis of the DEGs.csv
