# Supplementary material
Source: MDPI journal article supplement (https://www.mdpi.com/2410-3888/7/3/98)
Supplement: s1 [file s1 › Table S1 The information of total reads and passed reads used in this study.pdf]

**Table S1.** The information of total reads and passed reads used in this study

| Sample      | Raw read | Clean read | Mapping rate |
|-------------|----------|------------|--------------|
| <b>KL-1</b> | 2990417  | 2507567    | 87.88%       |
| <b>KL-2</b> | 1749882  | 1500788    | 82.21%       |
| <b>Kn-1</b> | 3560098  | 3068762    | 90.33%       |
| <b>Kn-2</b> | 3518347  | 3047622    | 87.79%       |
