# Supplementary material
Source: MDPI journal article supplement (https://www.mdpi.com/2410-3888/7/3/98)
Supplement: s1 [file s1 › Table S2 GO enrichment analysis of the DEGs.csv]

	ONTOLOGY	ID	Description	GeneRatio	BgRatio	pvalue	p.adjust	qvalue	geneID	Count
GO:0034660	BP	GO:0034660	ncRNA metabolic process	177/4625	322/17035	2.23E-26	9.22E-23	8.64E-23	lcmt2/bysl/dcaf13/utp15/wdr12/rrs1/wdr36/asz1/mtfmt/adat3/rpf1/tsr2/exosc9/mrto4/tdrd1/tsr1/sars1/trmt61a/elp4/mdn1/rtraf/trmt1/wars2/mphosph10/rpusd4/ddx49/tdrd9/mtrex/rrp15/pih1d2/riok1/dkc1/mrm3a/lin28a/fbxw11b/utp4/utp25/ints6l/gtpbp3/henmt1/pes/lars1b/ints7/nol10/gnl3l/ddx56/ctu1/c1d/nsun4/snu13b/znhit3/rps21/ddx51/nol11/rpp30/exosc2/pus3/ddx18/rars2/rrp36/qrsl1/sepsecs/trmt44/trmt2b/elac2/r…	177
GO:0034470	BP	GO:0034470	ncRNA processing	151/4625	259/17035	2.88E-26	9.22E-23	8.64E-23	lcmt2/bysl/dcaf13/utp15/wdr12/rrs1/wdr36/mtfmt/adat3/rpf1/tsr2/exosc9/mrto4/tsr1/trmt61a/elp4/mdn1/rtraf/trmt1/mphosph10/rpusd4/ddx49/mtrex/rrp15/pih1d2/riok1/dkc1/mrm3a/lin28a/fbxw11b/utp4/utp25/ints6l/gtpbp3/pes/ints7/nol10/gnl3l/ddx56/ctu1/c1d/nsun4/snu13b/znhit3/rps21/ddx51/nol11/rpp30/exosc2/pus3/ddx18/rrp36/trmt44/trmt2b/elac2/riok2/exosc6/pwp2h/exosc10/polr3k/tyw3/thg1l/utp11/exosc5/tfb1m/…	151
GO:0016072	BP	GO:0016072	rRNA metabolic process	96/4625	145/17035	8.11E-23	1.73E-19	1.62E-19	bysl/dcaf13/utp15/wdr12/rrs1/wdr36/rpf1/tsr2/exosc9/mrto4/tsr1/mdn1/mphosph10/ddx49/mtrex/rrp15/pih1d2/riok1/dkc1/mrm3a/fbxw11b/utp4/utp25/pes/nol10/gnl3l/ddx56/c1d/nsun4/snu13b/znhit3/rps21/ddx51/nol11/exosc2/ddx18/rrp36/riok2/exosc6/rnaset2/pwp2h/exosc10/utp11/exosc5/tfb1m/wdr75/wdr18/rrp9/rpl7l1/nsun5/nop2/abt1/rpf2/eri1/tbl3/nat10/imp4/mrpl1/ebna1bp2/pelo/drosha/mettl16/utp3/nol6/urb1/las1l/d…	96
GO:0006364	BP	GO:0006364	rRNA processing	91/4625	138/17035	1.62E-21	2.60E-18	2.43E-18	bysl/dcaf13/utp15/wdr12/rrs1/wdr36/rpf1/tsr2/exosc9/mrto4/tsr1/mdn1/mphosph10/ddx49/mtrex/rrp15/pih1d2/riok1/dkc1/mrm3a/fbxw11b/utp4/utp25/pes/nol10/gnl3l/ddx56/c1d/nsun4/snu13b/znhit3/rps21/ddx51/nol11/exosc2/ddx18/rrp36/riok2/exosc6/pwp2h/exosc10/utp11/tfb1m/wdr75/wdr18/rrp9/rpl7l1/nsun5/nop2/abt1/rpf2/eri1/tbl3/nat10/imp4/mrpl1/ebna1bp2/mettl16/utp3/nol6/urb1/las1l/dhx37/bud23/bop1/exosc8/mrm3…	91
GO:0042254	BP	GO:0042254	ribosome biogenesis	121/4625	209/17035	5.92E-21	7.58E-18	7.10E-18	bysl/noc2l/dcaf13/utp15/mterf3/wdr12/rrs1/wdr36/rpf1/tsr2/exosc9/mrto4/tsr1/ltv1/mdn1/mphosph10/ddx49/mtrex/rrp15/pih1d2/nmd3/riok1/dkc1/mrm3a/fbxw11b/utp4/utp25/pes/nol10/rpl5a/eif6/gnl3l/ddx56/c1d/nsun4/ppan/rps27.1/snu13b/znhit3/rps21/ddx51/nol11/exosc2/ddx18/rrp36/riok2/surf6/ddx31/exosc6/heatr3/pwp2h/exosc10/utp11/rsl24d1/tfb1m/wdr75/wdr18/rrp9/rpl7l1/nsun5/nop2/abt1/rpf2/znf593/nop16/pak1ip…	121
GO:0006259	BP	GO:0006259	DNA metabolic process	206/4625	433/17035	3.50E-20	3.74E-17	3.50E-17	pms1/mnat1/gins2/ruvbl1/rpa3/polb/parp3/zgc:112496/zgc:173742/nabp1a/wrnip1/rad52/dnase1l1/rad21a/hmgb3b/tdrd1/gins1/stn1/apex2/fign/orc3/xrcc1/cdc6/xrcc4/ddx11/dnase1l4.2/fen1/tdrd9/spo11/xrcc2/smarcad1a/ercc4/pola2/dnase1l4.1/prpf19/wdhd1/gins4/mgme1/ssrp1b/msh2/neil1/rad54l/psme4b/rnaseh2a/fancf/mcm5/rad23aa/neil3/pif1/cgas/sfr1/ercc2/dtl/cdc7/dnase1l1l/mcm3/nsmce4a/top2a/fancg/trip13/fanci/po…	206
GO:0022613	BP	GO:0022613	ribonucleoprotein complex biogenesis	152/4625	301/17035	3.72E-18	3.41E-15	3.19E-15	bysl/noc2l/dcaf13/ruvbl1/utp15/mterf3/wdr12/rrs1/wdr36/rpf1/tsr2/sfswap/exosc9/mrto4/tsr1/ltv1/mdn1/snrpc/snrpd1/mphosph10/ddx49/eif2d/mtrex/rrp15/snrpd3/pih1d2/prpf19/nmd3/riok1/dkc1/mrm3a/fbxw11b/utp4/utp25/pes/nol10/rpl5a/eif6/gnl3l/ddx56/c1d/nsun4/ppan/rps27.1/snu13b/lsm4/znhit3/rps21/ddx51/mcts1/nol11/exosc2/ddx18/rrp36/riok2/surf6/ddx31/exosc6/heatr3/eif3hb/pwp2h/exosc10/utp11/coil/rsl24d1/…	152
GO:0022402	BP	GO:0022402	cell cycle process	218/4625	486/17035	1.60E-17	1.28E-14	1.20E-14	snx9a/kifc1/psme1/nusap1/cep135/lats1/pard6b/reep3b/unc119.2/spice1/nabp1a/mad2l1/skp2/ncapd2/kif4/nek2/rad21a/cep170aa/phf8/rae1/ect2/tmpoa/fbxl18/gins1/pdcd2/rbl1/anapc5/orc3/llgl1/ppp1r7/cdc6/sept4a/cdc25b/cdkn1ca/kif11/ndel1a/ddx11/ccna2/stag2a/cetn3/meis1b/psme3/aurka/wee2/tubgcp2/tdrd9/csnk2a2b/spo11/ercc4/esco2/kif23/znf207a/rab11fip3/haus4/ccng2/rad54l/zw10/plk2b/haus5/mcm5/dscc1/cdc14b/n…	218
GO:1903047	BP	GO:1903047	mitotic cell cycle process	139/4625	276/17035	1.37E-16	9.72E-14	9.10E-14	snx9a/kifc1/psme1/nusap1/lats1/reep3b/unc119.2/spice1/nabp1a/mad2l1/skp2/ncapd2/kif4/nek2/rad21a/phf8/rae1/tmpoa/fbxl18/gins1/pdcd2/rbl1/anapc5/ppp1r7/cdc6/cdc25b/kif11/ndel1a/ccna2/meis1b/psme3/aurka/wee2/kif23/znf207a/ccng2/zw10/dscc1/cdc14b/dtl/mcm3/nsl1/top2a/stil/chek2/mis12/cdk2/ccnd3/cdkn1ba/psme2/mcm6l/ncaph2/mad1l1/top2b/nuf2/ncapd3/tipin/ccnb2/ensaa/mcm3l/aurkb/plk3/fbxo5/orc1/mcm4/nbn/…	139
GO:0006260	BP	GO:0006260	DNA replication	77/4625	126/17035	1.22E-15	7.80E-13	7.30E-13	gins2/rpa3/polb/zgc:173742/wrnip1/gins1/orc3/cdc6/ddx11/fen1/rrm1/esco2/pola2/wdhd1/gins4/mgme1/ssrp1b/mcm5/dscc1/pif1/dtl/mcm3/pold1/rbbp4/mcm6l/rfc5/gmnn/tipin/rpa2/ssrp1a/mcm3l/gins3/orc1/ssbp1/mcm4/wdr18/rmi1/rad51/nfic/cdc45/pola1/ticrr/mcm10/cdt1/prim2/pcna/rpl9/mcmbp/rfc3/mcm6/pole/terf1/recql5/lig1/nfixb/chaf1a/msh3/tonsl/mms22l/etaa1/orc6/pold3/eme1/blm/rrm2/dna2/si:dkey-28b4.7/dbf4b/top…	77
GO:0006281	BP	GO:0006281	DNA repair	137/4625	291/17035	2.02E-13	1.18E-10	1.10E-10	pms1/mnat1/gins2/ruvbl1/rpa3/polb/parp3/zgc:112496/nabp1a/wrnip1/rad52/rad21a/apex2/fign/xrcc1/xrcc4/ddx11/fen1/spo11/xrcc2/smarcad1a/ercc4/prpf19/wdhd1/gins4/mgme1/ssrp1b/msh2/neil1/rad54l/psme4b/rnaseh2a/fancf/mcm5/rad23aa/neil3/pif1/cgas/sfr1/ercc2/dtl/cdc7/mcm3/nsmce4a/fancg/trip13/fanci/pold1/rad18/inip/parpbp/rbm17/mcm6l/zgc:101664/tdp2b/rpa2/ssrp1a/mcm3l/poll/xpc/mcm4/nbn/polr2i/rmi1/rad51…	137
GO:0006261	BP	GO:0006261	DNA-dependent DNA replication	52/4625	80/17035	1.60E-12	8.53E-10	7.99E-10	wrnip1/gins1/orc3/cdc6/pola2/wdhd1/gins4/mgme1/mcm5/mcm3/pold1/mcm6l/rfc5/tipin/mcm3l/orc1/ssbp1/mcm4/wdr18/rad51/cdc45/pola1/ticrr/mcm10/cdt1/prim2/pcna/mcmbp/rfc3/mcm6/pole/recql5/lig1/msh3/tonsl/mms22l/etaa1/orc6/pold3/eme1/blm/dna2/si:dkey-28b4.7/dbf4b/cenpx/zranb3/pold2/pole2/orc4/mcm7/mcm2/msh6	52
GO:0006974	BP	GO:0006974	cellular response to DNA damage stimulus	170/4625	398/17035	9.74E-12	4.80E-09	4.50E-09	pms1/znf281a/mnat1/gins2/ruvbl1/rpa3/polb/parp3/zgc:112496/nabp1a/wrnip1/rad52/rad21a/spred2b/apex2/fign/bokb/xrcc1/xrcc4/ddx11/fen1/spo11/xrcc2/smarcad1a/ercc4/prpf19/wdhd1/gins4/mgme1/ssrp1b/msh2/neil1/rad54l/psme4b/rnaseh2a/fancf/ints7/mcm5/rad23aa/neil3/pif1/cgas/sfr1/ercc2/dtl/cdc7/mcm3/nsmce4a/fancg/trip13/chek2/yju2/fanci/pold1/rad18/zbtb18/inip/parpbp/rbm17/mcm6l/zgc:101664/yars1/tdp2b/ti…	170
GO:0006310	BP	GO:0006310	DNA recombination	81/4625	155/17035	2.69E-11	1.23E-08	1.15E-08	gins2/ruvbl1/rpa3/nabp1a/rad52/hmgb3b/fign/xrcc4/spo11/xrcc2/ercc4/gins4/msh2/rad54l/mcm5/pif1/cgas/sfr1/ercc2/cdc7/mcm3/nsmce4a/top2a/trip13/parpbp/mcm6l/top2b/histh1l/zgc:101664/rpa2/mcm3l/psmc3ip/h1-0/mcm4/nbn/rmi1/rad51/nabp1b/cdc45/mei4/rnf8/dclre1c/rag1/hmgb2b/h1-10/ruvbl2/exo1/mcm6/recql5/lig1/fan1/msh3/fancb/zswim7/mus81/tonsl/mrnip/brip1/mms22l/eme1/blm/si:ch211-103n10.5/supv3l1/brca2/mm…	81
GO:0006302	BP	GO:0006302	double-strand break repair	69/4625	128/17035	1.29E-10	5.50E-08	5.15E-08	gins2/rpa3/polb/parp3/nabp1a/rad52/rad21a/fign/xrcc4/spo11/xrcc2/smarcad1a/ercc4/gins4/rad54l/mcm5/cgas/sfr1/cdc7/mcm3/trip13/parpbp/mcm6l/zgc:101664/tdp2b/rpa2/mcm3l/poll/mcm4/nbn/rmi1/rad51/rnf169/abraxas1/nabp1b/cdc45/cdca5/rnf8/dclre1c/mcm6/recql5/fan1/fancb/zswim7/mus81/dek/tonsl/xrcc6/tdp1/mrnip/brip1/mms22l/eme1/blm/brca2/mms19/parp2/rbbp8l/dclre1a/si:dkey-249d8.1/actr5/slx1b/xrcc5/mcm7/zg…	69
GO:0007059	BP	GO:0007059	chromosome segregation	77/4625	154/17035	1.23E-09	4.92E-07	4.60E-07	nusap1/zgc:173742/spice1/mad2l1/ncapd2/nek2/rad21a/anapc5/ppp1r7/ndel1a/ddx11/stag2a/csnk2a2b/ercc4/esco2/kif23/znf207a/zw10/dscc1/ntmt1/nsl1/top2a/trip13/mis12/ncaph2/mad1l1/top2b/nuf2/ncapd3/aurkb/ska1/ttk/rmi1/cdca8/cenpn/mei4/wapla/cdca5/cdc23/lrmp/cdt1/ccnb1/mcmbp/birc5b/stag1a/ncaph/cenpe/chtf8/mus81/mos/ska3/ncapg/knl1/ndc80/espl1/pttg1/anapc1/bub3/eme1/bub1/bub1ba/mms19/top1/cdca9/cenpx/c…	77
GO:0032259	BP	GO:0032259	methylation	89/4625	187/17035	1.64E-09	6.19E-07	5.79E-07	lcmt2/trmt2a/kmt2a/mtf2/supt6h/gnmt/tdrd1/mettl2a/trmt61a/mettl13/trmt1/mettl21a/hnmt/tdrd9/pcmt/mrm3a/mettl8/gtpbp3/henmt1/prmt3/icmt/nsun4/asmtl/ntmt1/comtb/nsd2/suv39h1a/dnmt1/trmt44/trmt2b/trdmt1/setd4/prmt9/dnmt3bb.1/tyw3/trmt11/tfb1m/setdb1a/dmap1/trmt6/unga/wtap/cebpb/nsun5/nop2/pou5f3/prmt7/shmt1/thada/mettl16/nsun2/hells/dnmt3bb.2/dnmt3bb.3/pld6/alkbh8/kmt2bb/setd1ba/dot1l/piwil2/bud23/s…	89
GO:0044770	BP	GO:0044770	cell cycle phase transition	65/4625	125/17035	3.11E-09	1.11E-06	1.04E-06	psme1/lats1/mad2l1/skp2/phf8/fbxl18/rbl1/anapc5/ppp1r7/cdc6/cdc25b/ccna2/meis1b/psme3/znf207a/ccng2/zw10/cdc14b/dtl/nek10/cdk2/ccnd3/cdkn1ba/psme2/mad1l1/tipin/ccnb2/ensaa/aurkb/plk3/orc1/nbn/ttk/chmp7/ccna1/abraxas1/cdc45/cdca5/cdc23/ticrr/rbl2/ccnb1/cdkn1bb/cntd2/mastl/topbp1/ccni/mos/ndc80/mrnip/anapc1/bub3/bub1/ccnjl/bub1ba/lats2/dbf4b/cdk1/gnl2/ccne1/zgc:162895/ccnd1/kdm8/spdl1/chek1	65
GO:0000280	BP	GO:0000280	nuclear division	77/4625	158/17035	5.41E-09	1.82E-06	1.71E-06	kifc1/nusap1/spice1/mad2l1/ncapd2/nek2/rad21a/pdcd2/anapc5/ppp1r7/kif11/ndel1a/aurka/wee2/tdrd9/spo11/ercc4/kif23/znf207a/rad54l/zw10/dscc1/cdc14b/nsl1/top2a/trip13/mis12/ncaph2/mad1l1/top2b/nuf2/ncapd3/aurkb/psmc3ip/fbxo5/ttk/chmp7/rmi1/rad51/bora/cdca8/mei4/wapla/cdca5/cdc23/cdt1/ccnb1/birc5b/sass6/ncaph/msh3/cenpe/chtf8/mus81/mos/ncapg/ndc80/brip1/espl1/pttg1/birc5a/anapc1/bub3/eme1/bub1/bub1b…	77
GO:0044772	BP	GO:0044772	mitotic cell cycle phase transition	60/4625	114/17035	6.85E-09	2.19E-06	2.05E-06	psme1/lats1/mad2l1/skp2/phf8/fbxl18/rbl1/anapc5/ppp1r7/cdc6/cdc25b/ccna2/meis1b/psme3/znf207a/ccng2/zw10/cdc14b/dtl/cdk2/ccnd3/cdkn1ba/psme2/mad1l1/ccnb2/ensaa/aurkb/plk3/orc1/nbn/ttk/chmp7/ccna1/cdc45/cdca5/cdc23/ticrr/rbl2/ccnb1/cdkn1bb/cntd2/mastl/topbp1/ccni/ndc80/mrnip/anapc1/bub3/bub1/ccnjl/bub1ba/lats2/cdk1/gnl2/ccne1/zgc:162895/ccnd1/kdm8/spdl1/chek1	60
GO:0000075	BP	GO:0000075	cell cycle checkpoint	45/4625	77/17035	7.45E-09	2.27E-06	2.13E-06	nabp1a/mad2l1/cdc6/wee2/znf207a/zw10/dtl/top2a/trip13/chek2/mad1l1/top2b/tipin/aurkb/plk3/orc1/nbn/rad1/ttk/abraxas1/nabp1b/ticrr/cdt1/wdr76/rad9a/zwilch/topbp1/dot1l/atrip/mus81/ndc80/mrnip/etaa1/chfr/rad9b/bub3/eme1/bub1/bub1ba/si:ch73-352p4.5/si:dkey-249d8.1/zgc:162895/ccnd1/spdl1/chek1	45
GO:0000460	BP	GO:0000460	maturation of 5.8S rRNA	19/4625	22/17035	1.07E-08	3.13E-06	2.93E-06	wdr12/rrs1/exosc9/mtrex/pes/rps21/exosc2/exosc10/abt1/eri1/urb1/las1l/bop1/exosc8/mphosph6/gnl2/exosc3/exosc7/ftsj3	19
GO:0098813	BP	GO:0098813	nuclear chromosome segregation	63/4625	123/17035	1.17E-08	3.25E-06	3.04E-06	nusap1/spice1/mad2l1/ncapd2/rad21a/anapc5/ppp1r7/ddx11/stag2a/ercc4/esco2/kif23/znf207a/zw10/dscc1/nsl1/top2a/trip13/mis12/ncaph2/mad1l1/top2b/nuf2/ncapd3/aurkb/ttk/rmi1/cdca8/mei4/wapla/cdca5/cdc23/cdt1/ccnb1/mcmbp/birc5b/stag1a/ncaph/cenpe/chtf8/mus81/mos/ncapg/knl1/ndc80/espl1/pttg1/anapc1/bub3/eme1/bub1/bub1ba/cdca9/cenpx/si:dkey-57a22.11/zgc:194246/si:dkey-25o16.4/abraxas2/incenp/rmi2/syce2/…	63
GO:0007093	BP	GO:0007093	mitotic cell cycle checkpoint	36/4625	57/17035	1.35E-08	3.60E-06	3.37E-06	nabp1a/mad2l1/cdc6/wee2/znf207a/zw10/dtl/top2a/chek2/mad1l1/top2b/tipin/aurkb/plk3/orc1/nbn/ttk/nabp1b/ticrr/rad9a/zwilch/topbp1/mus81/ndc80/mrnip/chfr/rad9b/bub3/eme1/bub1/bub1ba/si:dkey-249d8.1/zgc:162895/ccnd1/spdl1/chek1	36
GO:0006270	BP	GO:0006270	DNA replication initiation	20/4625	24/17035	1.48E-08	3.72E-06	3.48E-06	orc3/cdc6/pola2/mcm5/mcm3/mcm6l/mcm3l/orc1/mcm4/wdr18/cdc45/pola1/ticrr/mcm10/cdt1/mcm6/orc6/orc4/mcm7/mcm2	20
GO:1901361	BP	GO:1901361	organic cyclic compound catabolic process	106/4625	242/17035	1.55E-08	3.72E-06	3.48E-06	ada/cyp46a1.2/acaa1/rnaseh2b/dnase1l1/dera/exosc9/mrto4/si:ch73-71d17.1/nudt17/kmo/dnase1l4.2/fen1/cyp46a1.1/hnmt/mtrex/spo11/ncbp2/tbp/dnase1l4.1/ada2b/fxr2/lin28a/hal/rnaseh2a/cnot8/aox6/pah/hddc3/pabpc1b/zgc:92040/zfp36l1b/dnd1/fxr1/lsm4/dnase1l1l/comtb/hmox1a/exosc2/pde12/moxd1/ido1/dao.3/dao.2/exosc6/dazl/rnaset2/aldh8a1/exosc10/aldh4a1/zgc:103559/aspdh/magoh/exosc5/zgc:114130/upp1/rnaseh1/l…	106
GO:0000724	BP	GO:0000724	double-strand break repair via homologous recombination	44/4625	76/17035	1.62E-08	3.72E-06	3.48E-06	gins2/rpa3/nabp1a/rad52/fign/xrcc2/ercc4/gins4/rad54l/mcm5/cgas/sfr1/cdc7/mcm3/parpbp/mcm6l/zgc:101664/rpa2/mcm3l/mcm4/nbn/rmi1/rad51/nabp1b/cdc45/mcm6/recql5/fan1/fancb/zswim7/mus81/tonsl/mrnip/mms22l/blm/brca2/mms19/rbbp8l/si:dkey-249d8.1/slx1b/mcm7/zgc:162895/mcm2/rmi2	44
GO:0000725	BP	GO:0000725	recombinational repair	44/4625	76/17035	1.62E-08	3.72E-06	3.48E-06	gins2/rpa3/nabp1a/rad52/fign/xrcc2/ercc4/gins4/rad54l/mcm5/cgas/sfr1/cdc7/mcm3/parpbp/mcm6l/zgc:101664/rpa2/mcm3l/mcm4/nbn/rmi1/rad51/nabp1b/cdc45/mcm6/recql5/fan1/fancb/zswim7/mus81/tonsl/mrnip/mms22l/blm/brca2/mms19/rbbp8l/si:dkey-249d8.1/slx1b/mcm7/zgc:162895/mcm2/rmi2	44
GO:0000003	BP	GO:0000003	reproduction	117/4625	276/17035	2.72E-08	6.01E-06	5.63E-06	zgc:56699/gdf9/pde3a/stx2a/ncapd2/rad21a/smad2/tdrd1/cdc25b/aurka/wee2/tubgcp2/tdrd9/spo11/ercc4/ddx4/zp3e/ggt1b/rad54l/psme4b/henmt1/ptbp1a/zar1/ahr2/dnd1/ggt1a/top2a/trip13/lin9/macf1a/tubgcp3/tdrd7a/cyp17a1/ncaph2/top2b/nuf2/ncapd3/tdgf1/spinb/dazl/cxcl12a/bmp15/psmc3ip/zp3f.1/fbxo5/zp3b/zp3d.1/nbn/ca15b/ttk/rmi1/rad51/piwil1/cxcr4b/zp3a.1/zp3a.2/tert/mei4/wapla/wbp2nl/rnf8/lrmp/prmt7/ccnb1/ts…	117
GO:0009451	BP	GO:0009451	RNA modification	58/4625	113/17035	3.97E-08	8.32E-06	7.79E-06	lcmt2/a1cf/mtfmt/adat3/trmt61a/elp4/trmt1/rpusd4/dkc1/gtpbp3/henmt1/ctu1/nsun4/trub2/pus3/pus7/trmt44/si:ch1073-157b13.1/tyw3/thg1l/tfb1m/trmt6/wtap/qtrt1/nsun5/nop2/dph3/pus1/thada/nat10/mettl16/nsun2/naf1/sephs1/alkbh8/elp6/rpusd2/rbm47/alkbh5/bud23/trmt5/nhp2/tyw5/pus7l/mettl14/mettl1/gar1/si:dkey-85a20.4/wdr4/thumpd2/trmt61b/thumpd1/trmt9b/trmt13/nop10/ftsj3/adad2/tgs1	58
GO:0046700	BP	GO:0046700	heterocycle catabolic process	96/4625	217/17035	4.02E-08	8.32E-06	7.79E-06	ada/rnaseh2b/dnase1l1/dera/exosc9/mrto4/si:ch73-71d17.1/nudt17/kmo/dnase1l4.2/fen1/hnmt/mtrex/spo11/ncbp2/tbp/dnase1l4.1/ada2b/fxr2/lin28a/hal/rnaseh2a/cnot8/aox6/hddc3/pabpc1b/zgc:92040/zfp36l1b/dnd1/fxr1/lsm4/dnase1l1l/hmox1a/exosc2/pde12/ido1/dao.3/dao.2/exosc6/dazl/rnaset2/exosc10/aldh4a1/zgc:103559/aspdh/magoh/exosc5/zgc:114130/upp1/rnaseh1/lsm1/eri1/dcp1b/ada2a/carhsp1/pnrc2/dctpp1/cnot6l/p…	96
GO:0022414	BP	GO:0022414	reproductive process	115/4625	272/17035	4.24E-08	8.36E-06	7.82E-06	zgc:56699/gdf9/pde3a/stx2a/ncapd2/rad21a/smad2/tdrd1/cdc25b/aurka/wee2/tubgcp2/tdrd9/spo11/ercc4/ddx4/zp3e/ggt1b/rad54l/psme4b/henmt1/ptbp1a/zar1/ahr2/dnd1/ggt1a/top2a/trip13/macf1a/tubgcp3/tdrd7a/cyp17a1/ncaph2/top2b/nuf2/ncapd3/tdgf1/spinb/dazl/cxcl12a/bmp15/psmc3ip/zp3f.1/fbxo5/zp3b/zp3d.1/nbn/ca15b/ttk/rmi1/rad51/piwil1/cxcr4b/zp3a.1/zp3a.2/tert/mei4/wapla/wbp2nl/rnf8/lrmp/prmt7/ccnb1/tsga10/…	115
GO:0000727	BP	GO:0000727	double-strand break repair via break-induced replication	13/4625	13/17035	4.30E-08	8.36E-06	7.82E-06	gins2/gins4/mcm5/cdc7/mcm3/mcm6l/mcm3l/mcm4/cdc45/mcm6/mus81/mcm7/mcm2	13
GO:0006399	BP	GO:0006399	tRNA metabolic process	70/4625	147/17035	8.50E-08	1.60E-05	1.50E-05	lcmt2/mtfmt/adat3/exosc9/sars1/trmt61a/elp4/rtraf/trmt1/wars2/rpusd4/gtpbp3/lars1b/ctu1/rpp30/exosc2/pus3/rars2/qrsl1/sepsecs/trmt44/trmt2b/elac2/yars1/exosc10/polr3k/tyw3/thg1l/trmt10c/trmt6/qtrt1/dph3/rpp21/pars2/dtd1/elac1/pus1/thada/nat10/rars1/nsun2/sephs1/aimp1a/alkbh8/elp6/eprs1/exosc8/trmt5/tsen15/tyw5/prorp/ptcd1/mettl1/yars2/dus2/si:dkey-85a20.4/dus1l/rpph1/wdr4/tsen2/thumpd2/trmt61b/ex…	70
GO:0019439	BP	GO:0019439	aromatic compound catabolic process	98/4625	226/17035	9.67E-08	1.76E-05	1.65E-05	ada/acaa1/rnaseh2b/dnase1l1/dera/exosc9/mrto4/si:ch73-71d17.1/nudt17/kmo/dnase1l4.2/fen1/hnmt/mtrex/spo11/ncbp2/tbp/dnase1l4.1/ada2b/fxr2/lin28a/hal/rnaseh2a/cnot8/aox6/pah/hddc3/pabpc1b/zfp36l1b/dnd1/fxr1/lsm4/dnase1l1l/comtb/hmox1a/exosc2/pde12/moxd1/ido1/exosc6/dazl/rnaset2/aldh8a1/exosc10/zgc:103559/aspdh/magoh/exosc5/zgc:114130/upp1/rnaseh1/lsm1/eri1/dcp1b/ada2a/carhsp1/pnrc2/dctpp1/cnot6l/p…	98
GO:0000819	BP	GO:0000819	sister chromatid segregation	49/4625	92/17035	9.90E-08	1.76E-05	1.65E-05	nusap1/mad2l1/ncapd2/rad21a/anapc5/ppp1r7/ddx11/stag2a/esco2/kif23/znf207a/zw10/dscc1/nsl1/top2a/mis12/ncaph2/mad1l1/top2b/nuf2/ncapd3/aurkb/ttk/cdca8/wapla/cdca5/cdc23/cdt1/ccnb1/mcmbp/birc5b/stag1a/ncaph/cenpe/chtf8/mos/ncapg/ndc80/pttg1/anapc1/bub3/bub1/bub1ba/cdca9/si:dkey-57a22.11/incenp/rmi2/sgo1/spdl1	49
GO:0044270	BP	GO:0044270	cellular nitrogen compound catabolic process	93/4625	213/17035	1.38E-07	2.39E-05	2.24E-05	ada/rnaseh2b/dnase1l1/dera/exosc9/mrto4/si:ch73-71d17.1/nudt17/kmo/dnase1l4.2/fen1/hnmt/mtrex/spo11/ncbp2/tbp/dnase1l4.1/ada2b/fxr2/lin28a/hal/rnaseh2a/cnot8/aox6/hddc3/pabpc1b/zfp36l1b/dnd1/fxr1/lsm4/dnase1l1l/hmox1a/exosc2/pde12/ido1/exosc6/dazl/rnaset2/pm20d1.1/exosc10/zgc:103559/aspdh/magoh/exosc5/zgc:114130/upp1/rnaseh1/lsm1/eri1/dcp1b/ada2a/carhsp1/pnrc2/dctpp1/cnot6l/pelo/drosha/mettl16/ct…	93
GO:0008033	BP	GO:0008033	tRNA processing	50/4625	96/17035	1.86E-07	3.14E-05	2.94E-05	lcmt2/mtfmt/adat3/trmt61a/elp4/rtraf/trmt1/rpusd4/gtpbp3/ctu1/rpp30/pus3/trmt44/trmt2b/elac2/polr3k/tyw3/thg1l/trmt10c/trmt6/qtrt1/dph3/rpp21/elac1/pus1/thada/nat10/nsun2/sephs1/alkbh8/elp6/trmt5/tsen15/tyw5/prorp/ptcd1/mettl1/dus2/si:dkey-85a20.4/dus1l/rpph1/wdr4/tsen2/thumpd2/trmt61b/dus3l/thumpd1/pop4/trmt9b/trmt13	50
GO:0048285	BP	GO:0048285	organelle fission	83/4625	186/17035	2.07E-07	3.40E-05	3.19E-05	kifc1/pink1/nusap1/spice1/mad2l1/ncapd2/nek2/rad21a/pdcd2/anapc5/ppp1r7/kif11/ndel1a/aurka/wee2/tdrd9/spo11/ercc4/kif23/znf207a/rad54l/zw10/dscc1/cdc14b/mxd/nsl1/top2a/trip13/pex11g/mis12/ncaph2/mad1l1/top2b/nuf2/ncapd3/aurkb/psmc3ip/fbxo5/zgc:110130/ttk/chmp7/rmi1/rad51/bora/cdca8/mei4/wapla/cdca5/cdc23/si:dkeyp-110c12.3/cdt1/ccnb1/birc5b/sass6/mtfr2/ncaph/msh3/cenpe/chtf8/mus81/mos/ncapg/ndc80/…	83
GO:0045786	BP	GO:0045786	negative regulation of cell cycle	68/4625	145/17035	2.68E-07	4.29E-05	4.02E-05	nabp1a/mad2l1/nek2/rbl1/dlg1/cdc6/cdkn1ca/wee2/znf207a/rnf167/zw10/cdc14b/dtl/top2a/trip13/chek2/btg1/cdkn1ba/mdm2/mad1l1/top2b/btg4/gmnn/tipin/aurkb/plk3/fbxo5/cdkn3/orc1/si:dkey-79d12.5/nbn/rad1/ttk/abraxas1/nabp1b/ticrr/rbl2/cdt1/wdr76/cdkn1bb/rad9a/zwilch/topbp1/dot1l/atrip/mus81/mos/ndc80/mrnip/etaa1/chfr/pttg1/rad9b/bub3/cdkn1a/eme1/bub1/bub1ba/prr11/si:ch73-352p4.5/si:dkey-249d8.1/cdkn1d/z…	68
GO:0022412	BP	GO:0022412	cellular process involved in reproduction in multicellular organism	50/4625	97/17035	2.83E-07	4.43E-05	4.15E-05	pde3a/smad2/tdrd1/tdrd9/ddx4/zp3e/psme4b/henmt1/zar1/dnd1/trip13/macf1a/tdrd7a/tdgf1/dazl/cxcl12a/bmp15/zp3f.1/zp3b/zp3d.1/ca15b/ttk/piwil1/cxcr4b/zp3a.1/zp3a.2/mei4/rnf8/prmt7/ccnb1/zp3f.2/birc5b/ackr3b/zpcx/hnrnpa3/pld6/kdm6a/piwil2/ar/nanos3/zp3d.2/dazap1/tdrd5/nanog/tdrd12/zgc:173556/zgc:171778/zp3c/buc/cfap157	50
GO:0007292	BP	GO:0007292	female gamete generation	33/4625	55/17035	3.15E-07	4.81E-05	4.50E-05	pde3a/smad2/tdrd1/zp3e/henmt1/zar1/trip13/macf1a/tdrd7a/dazl/bmp15/zp3f.1/zp3b/zp3d.1/ttk/zp3a.1/zp3a.2/mei4/ccnb1/zp3f.2/birc5b/zpcx/pld6/piwil2/ar/nanos3/zp3d.2/tdrd5/diaph2/zgc:173556/zgc:171778/zp3c/buc	33
GO:0000466	BP	GO:0000466	maturation of 5.8S rRNA from tricistronic rRNA transcript (SSU-rRNA, 5.8S rRNA, LSU-rRNA)	16/4625	19/17035	3.43E-07	5.00E-05	4.68E-05	wdr12/rrs1/exosc9/pes/rps21/exosc2/exosc10/abt1/eri1/urb1/bop1/exosc8/gnl2/exosc3/exosc7/ftsj3	16
GO:0033260	BP	GO:0033260	nuclear DNA replication	16/4625	19/17035	3.43E-07	5.00E-05	4.68E-05	gins1/orc3/mcm5/mcm3/mcm6l/mcm3l/mcm4/rad51/cdc45/pola1/cdt1/mcm6/lig1/dbf4b/mcm7/mcm2	16
GO:0007276	BP	GO:0007276	gamete generation	64/4625	135/17035	3.66E-07	5.14E-05	4.81E-05	zgc:56699/pde3a/smad2/tdrd1/tdrd9/ddx4/zp3e/ggt1b/psme4b/henmt1/zar1/dnd1/ggt1a/trip13/macf1a/tdrd7a/tdgf1/spinb/dazl/cxcl12a/bmp15/zp3f.1/zp3b/zp3d.1/ca15b/ttk/piwil1/cxcr4b/zp3a.1/zp3a.2/tert/mei4/rnf8/prmt7/ccnb1/tsga10/zp3f.2/birc5b/ackr3b/sass6/zpcx/hnrnpa3/pld6/lgr4/kdm6a/piwil2/alkbh5/ar/nanos3/zp3d.2/mettl14/dazap1/tdrd5/nanog/tdrd12/diaph2/brca2/zgc:173556/zgc:171778/zgc:194246/zp3c/buc/…	64
GO:0051304	BP	GO:0051304	chromosome separation	29/4625	46/17035	3.69E-07	5.14E-05	4.81E-05	mad2l1/ncapd2/anapc5/ppp1r7/csnk2a2b/ercc4/znf207a/zw10/top2a/ncaph2/mad1l1/top2b/ncapd3/aurkb/ttk/rmi1/cdc23/mus81/mos/ndc80/espl1/pttg1/anapc1/bub3/eme1/bub1/bub1ba/cenpx/spdl1	29
GO:0051321	BP	GO:0051321	meiotic cell cycle	52/4625	103/17035	3.89E-07	5.30E-05	4.96E-05	ncapd2/rad21a/tdrd1/cdc25b/aurka/wee2/tubgcp2/tdrd9/spo11/ercc4/ddx4/rad54l/top2a/trip13/tubgcp3/ncaph2/top2b/nuf2/ncapd3/psmc3ip/fbxo5/nbn/ttk/rmi1/rad51/piwil1/mei4/wapla/birc5b/pdik1l/pld6/mns1/piwil2/msh3/mus81/mos/brip1/espl1/pttg1/eme1/bub1/bub1ba/cenpx/moto/si:dkey-57a22.11/zgc:194246/exd1/zgc:162895/syce2/sgo1/fbxo43/msh6	52
GO:0032504	BP	GO:0032504	multicellular organism reproduction	65/4625	138/17035	4.00E-07	5.34E-05	5.00E-05	zgc:56699/pde3a/smad2/tdrd1/tdrd9/ddx4/zp3e/ggt1b/psme4b/henmt1/zar1/ahr2/dnd1/ggt1a/trip13/macf1a/tdrd7a/tdgf1/spinb/dazl/cxcl12a/bmp15/zp3f.1/zp3b/zp3d.1/ca15b/ttk/piwil1/cxcr4b/zp3a.1/zp3a.2/tert/mei4/rnf8/prmt7/ccnb1/tsga10/zp3f.2/birc5b/ackr3b/sass6/zpcx/hnrnpa3/pld6/lgr4/kdm6a/piwil2/alkbh5/ar/nanos3/zp3d.2/mettl14/dazap1/tdrd5/nanog/tdrd12/diaph2/brca2/zgc:173556/zgc:171778/zgc:194246/zp3c…	65
GO:0043414	BP	GO:0043414	macromolecule methylation	63/4625	133/17035	4.67E-07	6.11E-05	5.72E-05	lcmt2/kmt2a/mtf2/supt6h/tdrd1/trmt61a/mettl13/trmt1/tdrd9/gtpbp3/henmt1/prmt3/icmt/nsun4/ntmt1/nsd2/suv39h1a/dnmt1/trmt44/setd4/prmt9/dnmt3bb.1/tyw3/tfb1m/setdb1a/trmt6/unga/wtap/cebpb/nsun5/nop2/pou5f3/prmt7/thada/mettl16/nsun2/hells/dnmt3bb.2/pld6/alkbh8/kmt2bb/setd1ba/dot1l/piwil2/bud23/trmt5/prmt6/mettl14/tdrd5/setmar/mettl1/hemk1/si:dkey-85a20.4/prmt5/gfi1b/wdr4/thumpd2/trmt61b/eed/ehmt2/trm…	63
GO:0045930	BP	GO:0045930	negative regulation of mitotic cell cycle	48/4625	94/17035	6.99E-07	8.86E-05	8.29E-05	nabp1a/mad2l1/rbl1/dlg1/cdc6/cdkn1ca/wee2/znf207a/zw10/cdc14b/dtl/top2a/chek2/btg1/cdkn1ba/mad1l1/top2b/btg4/tipin/aurkb/plk3/fbxo5/orc1/si:dkey-79d12.5/nbn/ttk/nabp1b/ticrr/rbl2/cdkn1bb/rad9a/zwilch/topbp1/mus81/ndc80/mrnip/chfr/pttg1/rad9b/bub3/eme1/bub1/bub1ba/si:dkey-249d8.1/zgc:162895/ccnd1/spdl1/chek1	48
GO:0048609	BP	GO:0048609	multicellular organismal reproductive process	64/4625	137/17035	7.05E-07	8.86E-05	8.29E-05	zgc:56699/pde3a/smad2/tdrd1/tdrd9/ddx4/zp3e/ggt1b/psme4b/henmt1/zar1/dnd1/ggt1a/trip13/macf1a/tdrd7a/tdgf1/spinb/dazl/cxcl12a/bmp15/zp3f.1/zp3b/zp3d.1/ca15b/ttk/piwil1/cxcr4b/zp3a.1/zp3a.2/tert/mei4/rnf8/prmt7/ccnb1/tsga10/zp3f.2/birc5b/ackr3b/sass6/zpcx/hnrnpa3/pld6/lgr4/kdm6a/piwil2/alkbh5/ar/nanos3/zp3d.2/mettl14/dazap1/tdrd5/nanog/tdrd12/diaph2/brca2/zgc:173556/zgc:171778/zgc:194246/zp3c/buc/…	64
GO:0010564	BP	GO:0010564	regulation of cell cycle process	74/4625	166/17035	9.70E-07	0.000119522	0.000111916	psme1/spice1/mad2l1/nek2/rae1/ect2/pdcd2/rbl1/anapc5/ppp1r7/cdc6/cdc25b/psme3/aurka/wee2/csnk2a2b/znf207a/rab11fip3/zw10/plk2b/cdc14b/dtl/stil/trip13/nek10/cdk2/ccnd3/psme2/mdm2/mad1l1/aurkb/plk3/fbxo5/orc1/klhl21/nbn/ttk/bora/abraxas1/cdc45/wapla/cdca5/cdc23/pkp4/ticrr/rbl2/tbl3/plk1/topbp1/mos/ndc80/mrnip/birc6/pttg1/anapc1/bub3/bub1/tpx2/bub1ba/ikbkb/dbf4b/plk2a/si:dkey-25o16.4/gnl2/dync1li1/i…	74
GO:0048477	BP	GO:0048477	oogenesis	30/4625	50/17035	1.08E-06	0.000130861	0.000122534	pde3a/smad2/tdrd1/zp3e/henmt1/zar1/trip13/macf1a/tdrd7a/dazl/bmp15/zp3f.1/zp3b/zp3d.1/zp3a.1/zp3a.2/mei4/ccnb1/zp3f.2/zpcx/pld6/piwil2/ar/nanos3/zp3d.2/tdrd5/zgc:173556/zgc:171778/zp3c/buc	30
GO:1903046	BP	GO:1903046	meiotic cell cycle process	39/4625	72/17035	1.11E-06	0.000132312	0.000123893	ncapd2/cdc25b/aurka/wee2/tdrd9/spo11/ercc4/rad54l/top2a/trip13/ncaph2/top2b/nuf2/ncapd3/psmc3ip/fbxo5/ttk/rmi1/rad51/mei4/wapla/birc5b/msh3/mus81/mos/brip1/espl1/pttg1/eme1/bub1/bub1ba/cenpx/si:dkey-57a22.11/zgc:194246/zgc:162895/syce2/sgo1/fbxo43/msh6	39
GO:0043628	BP	GO:0043628	ncRNA 3'-end processing	21/4625	30/17035	1.22E-06	0.000142153	0.000133107	exosc9/dkc1/ints6l/ints7/rps21/exosc2/elac2/exosc6/exosc10/polr3k/exosc5/ints14/eri1/elac1/exosc8/ptcd1/toe1/ints12/exosc3/exosc7/exosc4	21
GO:0044786	BP	GO:0044786	cell cycle DNA replication	17/4625	22/17035	1.40E-06	0.000160016	0.000149834	gins1/orc3/mcm5/mcm3/mcm6l/mcm3l/mcm4/rad51/cdc45/pola1/cdt1/mcm6/lig1/dbf4b/mcm7/mcm2/msh6	17
GO:0002520	BP	GO:0002520	immune system development	178/4625	483/17035	1.47E-06	0.000164893	0.000154401	slc40a1/spi1b/ncor2/pink1/dlc/kmt2a/brf1b/tbx20/nfkbiaa/bmi1a/chrd/phf8/eomesa/epc2/pdcd2/epas1a/hlx1/cbl/rpl22l1/jak3/gpr183a/ndrg1b/sae1/xrcc4/foxn1/meis1b/smarca1/slc4a1a/gata1a/ikzf1/npm1a/klf3/ada2b/dkc1/gata3/pdzk1ip1/klf1/hal/snrkb/msh2/tal1/nfe2/jak1/ncoa4/rps27.1/nr3c1/brd8/tspo/arpc1b/epb41b/klf6a/tph1a/jag1a/sptb/dnmt1/melk/ddx18/csrnp1a/rcor1/flvcr1/tpma/tgfb1b/ncor1/etnppl/zgc:101664…	178
GO:0006271	BP	GO:0006271	DNA strand elongation involved in DNA replication	12/4625	13/17035	1.55E-06	0.000171028	0.000160145	gins1/mcm3/mcm3l/mcm4/pola1/pcna/pole/lig1/pold3/dna2/pold2/mcm7	12
GO:0042273	BP	GO:0042273	ribosomal large subunit biogenesis	33/4625	58/17035	1.71E-06	0.000185954	0.000174121	noc2l/wdr12/rrs1/mrto4/mdn1/pes/rpl5a/eif6/ppan/snu13b/znhit3/ddx18/surf6/heatr3/rsl24d1/rpl7l1/rpf2/nop16/pak1ip1/mrpl1/ebna1bp2/nip7/urb1/ddx28/wdr74/las1l/bop1/nhp2/znhit6/gnl2/bxdc2/ftsj3/sdad1	33
GO:0000070	BP	GO:0000070	mitotic sister chromatid segregation	38/4625	71/17035	2.26E-06	0.000241101	0.000225758	nusap1/mad2l1/ncapd2/rad21a/anapc5/ppp1r7/kif23/znf207a/zw10/dscc1/nsl1/mis12/ncaph2/mad1l1/nuf2/ncapd3/aurkb/ttk/cdca8/cdca5/cdc23/cdt1/ccnb1/birc5b/ncaph/cenpe/chtf8/ncapg/ndc80/pttg1/anapc1/bub3/bub1/bub1ba/cdca9/incenp/sgo1/spdl1	38
GO:0030490	BP	GO:0030490	maturation of SSU-rRNA	25/4625	40/17035	2.98E-06	0.000311244	0.000291438	dcaf13/rrs1/tsr2/tsr1/riok1/fbxw11b/utp4/utp25/nol10/rps21/nol11/rrp36/riok2/pwp2h/abt1/tbl3/nat10/utp3/dhx37/fam207a/tdrd12/wdr46/utp6/heatr1/ddx52	25
GO:0001510	BP	GO:0001510	RNA methylation	28/4625	47/17035	3.01E-06	0.000311244	0.000291438	lcmt2/trmt61a/trmt1/gtpbp3/henmt1/nsun4/trmt44/tyw3/tfb1m/trmt6/wtap/nsun5/nop2/thada/mettl16/nsun2/alkbh8/bud23/trmt5/mettl14/mettl1/si:dkey-85a20.4/wdr4/thumpd2/trmt61b/trmt13/ftsj3/tgs1	28
GO:0007281	BP	GO:0007281	germ cell development	40/4625	77/17035	3.33E-06	0.000338373	0.00031684	pde3a/smad2/tdrd1/ddx4/zp3e/psme4b/henmt1/zar1/dnd1/trip13/macf1a/tdrd7a/dazl/bmp15/zp3f.1/zp3b/zp3d.1/piwil1/cxcr4b/zp3a.1/zp3a.2/mei4/rnf8/ccnb1/zp3f.2/zpcx/hnrnpa3/pld6/piwil2/ar/nanos3/zp3d.2/dazap1/tdrd5/tdrd12/zgc:173556/zgc:171778/zp3c/buc/cfap157	40
GO:0000278	BP	GO:0000278	mitotic cell cycle	174/4625	476/17035	3.41E-06	0.000341314	0.000319594	snx9a/kifc1/psme1/nusap1/lats1/reep3b/unc119.2/spice1/nabp1a/mad2l1/skp2/ncapd2/kif4/nek2/rad21a/phf8/rae1/tmpoa/fbxl18/gins1/pdcd2/cks1b/rbl1/anapc5/dlg1/ppp1r7/cdc6/cdc25b/cdkn1ca/kif11/ndel1a/ccna2/meis1b/psme3/aurka/wee2/tubgcp2/esco2/kif23/znf207a/wdhd1/ccng2/zw10/plk2b/mcm5/dscc1/cdc14b/ppp2r2aa/dtl/mcm3/nsl1/top2a/stil/chek2/mis12/cdk2/btg1/ccnd3/cdkn1ba/tubgcp3/mybl2b/psme2/mcm6l/ncaph2/m…	174
GO:0140014	BP	GO:0140014	mitotic nuclear division	52/4625	109/17035	3.49E-06	0.000344601	0.000322673	kifc1/nusap1/spice1/mad2l1/ncapd2/nek2/rad21a/pdcd2/anapc5/ppp1r7/kif11/ndel1a/aurka/kif23/znf207a/zw10/dscc1/cdc14b/nsl1/mis12/ncaph2/mad1l1/nuf2/ncapd3/aurkb/fbxo5/ttk/chmp7/bora/cdca8/cdca5/cdc23/cdt1/ccnb1/birc5b/ncaph/cenpe/chtf8/ncapg/ndc80/pttg1/birc5a/anapc1/bub3/bub1/bub1ba/cdca9/gnl2/abraxas2/incenp/sgo1/spdl1	52
GO:0140013	BP	GO:0140013	meiotic nuclear division	32/4625	57/17035	3.64E-06	0.000353371	0.000330885	wee2/tdrd9/spo11/ercc4/rad54l/top2a/trip13/top2b/nuf2/psmc3ip/fbxo5/ttk/rmi1/rad51/mei4/wapla/birc5b/msh3/mus81/mos/brip1/espl1/pttg1/eme1/bub1/bub1ba/cenpx/si:dkey-57a22.11/zgc:194246/syce2/sgo1/fbxo43	32
GO:0043902	BP	GO:0043902	positive regulation of multi-organism process	15/4625	19/17035	3.80E-06	0.000363749	0.000340602	pde3a/smad2/zp3e/ptbp1a/zar1/zp3f.1/zp3b/zp3d.1/zp3a.1/zp3a.2/zp3f.2/zpcx/zp3d.2/zgc:173556/zp3c	15
GO:0051301	BP	GO:0051301	cell division	90/4625	218/17035	3.97E-06	0.000374528	0.000350695	snx9a/nusap1/ercc6l/reep3b/unc119.2/ncapd2/dct/rad21a/specc1la/rae1/ect2/cks1b/rbl1/fign/cdc6/sept4a/aurka/mtrex/kif23/rab11fip3/plk2b/cdc14b/katna1/sept3/arpp19a/sept8a/nuf2/ncapd3/tgfb1b/tipin/ensaa/aurkb/gdf3/plk3/fbxo5/klhl21/ska1/arpp19b/ttk/tgfb1a/bora/cdca8/cdc45/unc119b/cdc23/kif20a/pkp4/rbl2/cdt1/notch3/mcmbp/cdc16/pelo/mastl/cdc27/zwilch/sass6/plk1/rock1/ncaph/ensab/ska3/jtb/ndc80/birc6…	90
GO:0030099	BP	GO:0030099	myeloid cell differentiation	79/4625	186/17035	4.27E-06	0.000396463	0.000371235	slc40a1/spi1b/ncor2/pink1/kmt2a/brf1b/phf8/epc2/pdcd2/jak3/gpr183a/smarca1/slc4a1a/gata1a/klf3/ada2b/klf1/tal1/nfe2/ncoa4/rps27.1/tspo/arpc1b/epb41b/klf6a/sptb/melk/ddx18/flvcr1/tpma/ncor1/cebpa/rgs18/alas2/klf17/mpl/chrac1/lpar2a/tert/csf3r/csf1rb/myb/slc7a7/cicb/mastl/sf3b1/irf8/tmem88a/kdm6bb/ak3/flt3/adnp2a/abcc5/abcb10/rasa3/spi1a/atp5if1a/klf9/tle3b/ptena/nrros/smyd5/smim1/dok2/tet2/brd4/jm…	79
GO:0042274	BP	GO:0042274	ribosomal small subunit biogenesis	31/4625	55/17035	4.60E-06	0.000421438	0.00039462	dcaf13/rrs1/tsr2/tsr1/ltv1/riok1/fbxw11b/utp4/utp25/nol10/rps27.1/rps21/nol11/rrp36/riok2/surf6/pwp2h/abt1/tbl3/nat10/utp3/eral1/nom1/dhx37/fam207a/tdrd12/wdr46/utp6/rrp7a/heatr1/ddx52	31
GO:0060046	BP	GO:0060046	regulation of acrosome reaction	11/4625	12/17035	5.28E-06	0.00046385	0.000434333	zp3e/zp3f.1/zp3b/zp3d.1/zp3a.1/zp3a.2/zp3f.2/zpcx/zp3d.2/zgc:173556/zp3c	11
GO:1902969	BP	GO:1902969	mitotic DNA replication	11/4625	12/17035	5.28E-06	0.00046385	0.000434333	gins1/mcm3/mcm6l/mcm3l/mcm4/rad51/cdc45/pola1/mcm6/lig1/mcm2	11
GO:2000344	BP	GO:2000344	positive regulation of acrosome reaction	11/4625	12/17035	5.28E-06	0.00046385	0.000434333	zp3e/zp3f.1/zp3b/zp3d.1/zp3a.1/zp3a.2/zp3f.2/zpcx/zp3d.2/zgc:173556/zp3c	11
GO:0019953	BP	GO:0019953	sexual reproduction	69/4625	158/17035	5.37E-06	0.000464841	0.000435261	zgc:56699/pde3a/stx2a/smad2/tdrd1/tdrd9/ddx4/zp3e/ggt1b/psme4b/henmt1/ptbp1a/zar1/dnd1/ggt1a/trip13/macf1a/tdrd7a/tdgf1/spinb/dazl/cxcl12a/bmp15/zp3f.1/zp3b/zp3d.1/ca15b/ttk/piwil1/cxcr4b/zp3a.1/zp3a.2/tert/mei4/wbp2nl/rnf8/lrmp/prmt7/ccnb1/tsga10/zp3f.2/birc5b/ackr3b/sass6/zpcx/hnrnpa3/pld6/lgr4/kdm6a/piwil2/alkbh5/ar/nanos3/zp3d.2/mettl14/dazap1/tdrd5/nanog/tdrd12/diaph2/brca2/zgc:173556/zgc:17…	69
GO:0044703	BP	GO:0044703	multi-organism reproductive process	69/4625	159/17035	6.99E-06	0.000589289	0.00055179	zgc:56699/pde3a/stx2a/smad2/tdrd1/tdrd9/ddx4/zp3e/ggt1b/psme4b/henmt1/ptbp1a/zar1/dnd1/ggt1a/trip13/macf1a/tdrd7a/tdgf1/spinb/dazl/cxcl12a/bmp15/zp3f.1/zp3b/zp3d.1/ca15b/ttk/piwil1/cxcr4b/zp3a.1/zp3a.2/tert/mei4/wbp2nl/rnf8/lrmp/prmt7/ccnb1/tsga10/zp3f.2/birc5b/ackr3b/sass6/zpcx/hnrnpa3/pld6/lgr4/kdm6a/piwil2/alkbh5/ar/nanos3/zp3d.2/mettl14/dazap1/tdrd5/nanog/tdrd12/diaph2/brca2/zgc:173556/zgc:17…	69
GO:0051704	BP	GO:0051704	multi-organism process	69/4625	159/17035	6.99E-06	0.000589289	0.00055179	zgc:56699/pde3a/stx2a/smad2/tdrd1/tdrd9/ddx4/zp3e/ggt1b/psme4b/henmt1/ptbp1a/zar1/dnd1/ggt1a/trip13/macf1a/tdrd7a/tdgf1/spinb/dazl/cxcl12a/bmp15/zp3f.1/zp3b/zp3d.1/ca15b/ttk/piwil1/cxcr4b/zp3a.1/zp3a.2/tert/mei4/wbp2nl/rnf8/lrmp/prmt7/ccnb1/tsga10/zp3f.2/birc5b/ackr3b/sass6/zpcx/hnrnpa3/pld6/lgr4/kdm6a/piwil2/alkbh5/ar/nanos3/zp3d.2/mettl14/dazap1/tdrd5/nanog/tdrd12/diaph2/brca2/zgc:173556/zgc:17…	69
GO:0048534	BP	GO:0048534	hematopoietic or lymphoid organ development	172/4625	475/17035	7.38E-06	0.000613988	0.000574917	slc40a1/spi1b/ncor2/pink1/dlc/kmt2a/brf1b/tbx20/nfkbiaa/bmi1a/chrd/phf8/eomesa/epc2/pdcd2/epas1a/hlx1/cbl/rpl22l1/jak3/gpr183a/ndrg1b/sae1/foxn1/meis1b/smarca1/slc4a1a/gata1a/ikzf1/npm1a/klf3/ada2b/dkc1/gata3/pdzk1ip1/klf1/hal/snrkb/tal1/nfe2/jak1/ncoa4/rps27.1/nr3c1/brd8/tspo/arpc1b/epb41b/klf6a/tph1a/jag1a/sptb/dnmt1/melk/ddx18/csrnp1a/rcor1/flvcr1/tpma/tgfb1b/ncor1/etnppl/cebpa/smad3a/rgs18/cd…	172
GO:0006267	BP	GO:0006267	pre-replicative complex assembly involved in nuclear cell cycle DNA replication	9/4625	9/17035	7.97E-06	0.000625042	0.000585268	orc3/mcm5/mcm3/mcm6l/mcm3l/mcm4/mcm6/mcm7/mcm2	9
GO:0036388	BP	GO:0036388	pre-replicative complex assembly	9/4625	9/17035	7.97E-06	0.000625042	0.000585268	orc3/mcm5/mcm3/mcm6l/mcm3l/mcm4/mcm6/mcm7/mcm2	9
GO:1902299	BP	GO:1902299	pre-replicative complex assembly involved in cell cycle DNA replication	9/4625	9/17035	7.97E-06	0.000625042	0.000585268	orc3/mcm5/mcm3/mcm6l/mcm3l/mcm4/mcm6/mcm7/mcm2	9
GO:0016075	BP	GO:0016075	rRNA catabolic process	12/4625	14/17035	8.13E-06	0.000625042	0.000585268	exosc9/exosc2/exosc6/rnaset2/exosc10/exosc5/pelo/drosha/exosc8/exosc3/exosc7/exosc4	12
GO:1905516	BP	GO:1905516	positive regulation of fertilization	12/4625	14/17035	8.13E-06	0.000625042	0.000585268	zp3e/ptbp1a/zp3f.1/zp3b/zp3d.1/zp3a.1/zp3a.2/zp3f.2/zpcx/zp3d.2/zgc:173556/zp3c	12
GO:0000462	BP	GO:0000462	maturation of SSU-rRNA from tricistronic rRNA transcript (SSU-rRNA, 5.8S rRNA, LSU-rRNA)	19/4625	28/17035	8.17E-06	0.000625042	0.000585268	dcaf13/rrs1/tsr2/tsr1/fbxw11b/utp4/utp25/nol10/rps21/rrp36/pwp2h/abt1/tbl3/utp3/dhx37/fam207a/wdr46/utp6/heatr1	19
GO:0030097	BP	GO:0030097	hemopoiesis	168/4625	463/17035	8.19E-06	0.000625042	0.000585268	slc40a1/spi1b/ncor2/pink1/dlc/kmt2a/brf1b/tbx20/nfkbiaa/bmi1a/chrd/phf8/eomesa/epc2/pdcd2/epas1a/hlx1/cbl/rpl22l1/jak3/gpr183a/ndrg1b/sae1/meis1b/smarca1/slc4a1a/gata1a/ikzf1/npm1a/klf3/ada2b/dkc1/gata3/pdzk1ip1/klf1/hal/snrkb/tal1/nfe2/jak1/ncoa4/rps27.1/nr3c1/brd8/tspo/arpc1b/epb41b/klf6a/tph1a/jag1a/sptb/dnmt1/melk/ddx18/csrnp1a/rcor1/flvcr1/tpma/tgfb1b/ncor1/etnppl/cebpa/smad3a/rgs18/cdx4/dnm…	168
GO:0034655	BP	GO:0034655	nucleobase-containing compound catabolic process	75/4625	178/17035	1.04E-05	0.000784382	0.000734468	ada/rnaseh2b/dnase1l1/dera/exosc9/mrto4/nudt17/dnase1l4.2/fen1/mtrex/spo11/ncbp2/tbp/dnase1l4.1/ada2b/fxr2/lin28a/rnaseh2a/cnot8/hddc3/pabpc1b/zfp36l1b/dnd1/fxr1/lsm4/dnase1l1l/exosc2/pde12/exosc6/dazl/rnaset2/exosc10/aspdh/magoh/exosc5/zgc:114130/upp1/rnaseh1/lsm1/eri1/dcp1b/ada2a/carhsp1/pnrc2/dctpp1/cnot6l/pelo/drosha/mettl16/cth1/itpa/rnaset2l/cnot10/exosc8/mettl14/nt5e/tnrc6b/smg9/tnrc6c1/su…	75
GO:0034661	BP	GO:0034661	ncRNA catabolic process	14/4625	18/17035	1.11E-05	0.000830983	0.000778104	exosc9/lin28a/exosc2/exosc6/rnaset2/exosc10/exosc5/pelo/drosha/exosc8/exosc3/tent2/exosc7/exosc4	14
GO:0031123	BP	GO:0031123	RNA 3'-end processing	33/4625	62/17035	1.21E-05	0.00088947	0.000832869	exosc9/cpeb1b/papola/dkc1/lin28a/ints6l/cstf3/ints7/cpsf4/rps21/exosc2/cpsf2/elac2/exosc6/exosc10/polr3k/exosc5/ints14/fip1l1a/pcf11/eri1/elac1/exosc8/slbp2/ptcd1/toe1/supv3l1/lsm11/ints12/exosc3/exosc7/slbp/exosc4	33
GO:0031570	BP	GO:0031570	DNA integrity checkpoint	26/4625	45/17035	1.47E-05	0.001070363	0.001002251	cdc6/dtl/top2a/chek2/top2b/tipin/orc1/nbn/rad1/abraxas1/ticrr/cdt1/wdr76/rad9a/topbp1/dot1l/atrip/mus81/mrnip/etaa1/rad9b/eme1/si:ch73-352p4.5/zgc:162895/ccnd1/chek1	26
GO:0016073	BP	GO:0016073	snRNA metabolic process	20/4625	31/17035	1.49E-05	0.001072218	0.001003988	exosc9/dkc1/ints6l/ints7/exosc2/si:ch1073-157b13.1/exosc6/exosc10/exosc5/ints14/mettl16/exosc8/nhp2/toe1/ints12/exosc3/exosc7/ints4/exosc4/nop10	20
GO:0009126	BP	GO:0009126	purine nucleoside monophosphate metabolic process	19/4625	29/17035	1.76E-05	0.001242766	0.001163684	ak1/adss2/ada/aprt/ppat/ak4/prtfdc1/hprt1l/atic/adsl/impdh1b/ampd3b/paics/ak3/nt5e/gmps/adss1/gart/ampd2a	19
GO:0009167	BP	GO:0009167	purine ribonucleoside monophosphate metabolic process	19/4625	29/17035	1.76E-05	0.001242766	0.001163684	ak1/adss2/ada/aprt/ppat/ak4/prtfdc1/hprt1l/atic/adsl/impdh1b/ampd3b/paics/ak3/nt5e/gmps/adss1/gart/ampd2a	19
GO:0006403	BP	GO:0006403	RNA localization	38/4625	76/17035	1.84E-05	0.001280198	0.001198733	a1cf/rrs1/ddx19/rae1/ltv1/igf2bp3/nup35/ncbp2/thoc7/nmd3/eif6/ndc1/znhit3/exosc2/nup42/exosc10/thoc6/thoc5/magoh/znf593/phax/ncbp3/lrmp/thoc3/nol6/igf2bp1/nxt2/alkbh5/slbp2/eny2/nup98/thoc1/znhit6/qkia/exosc3/slbp/rbm26/sdad1	38
GO:0044774	BP	GO:0044774	mitotic DNA integrity checkpoint	18/4625	27/17035	2.07E-05	0.001424021	0.001333405	cdc6/dtl/top2a/chek2/top2b/tipin/orc1/nbn/ticrr/rad9a/topbp1/mus81/mrnip/rad9b/eme1/zgc:162895/ccnd1/chek1	18
GO:1901988	BP	GO:1901988	negative regulation of cell cycle phase transition	26/4625	46/17035	2.51E-05	0.001703669	0.001595258	mad2l1/rbl1/cdc6/znf207a/zw10/dtl/mad1l1/aurkb/plk3/orc1/nbn/ttk/abraxas1/ticrr/rbl2/topbp1/mos/ndc80/mrnip/bub3/bub1/bub1ba/zgc:162895/ccnd1/spdl1/chek1	26
GO:0007229	BP	GO:0007229	integrin-mediated signaling pathway	30/4625	56/17035	2.52E-05	0.001703669	0.001595258	adam8a/itgav/itga5/itgb5/phactr4a/itgb2/itga2b/lims1/itgb4/fermt3b/adam28/itgbl1/itga6a/adam17a/itgb7/fybb/itgb3b/itgb1b.1/itgae.2/lama5/itga6b/itgb1a/itga1/si:ch211-188c16.1/sema7a/im:7154036/zmp:0000001082/mibp2/itga4/itgb1b	30
GO:0071025	BP	GO:0071025	RNA surveillance	11/4625	13/17035	2.58E-05	0.001724363	0.001614634	exosc9/exosc2/exosc6/exosc10/exosc5/pelo/exosc8/supv3l1/exosc3/exosc7/exosc4	11
GO:0010948	BP	GO:0010948	negative regulation of cell cycle process	33/4625	64/17035	2.87E-05	0.001897357	0.00177662	mad2l1/nek2/rbl1/cdc6/znf207a/zw10/dtl/trip13/mdm2/mad1l1/aurkb/plk3/fbxo5/orc1/nbn/ttk/abraxas1/ticrr/rbl2/topbp1/mos/ndc80/mrnip/pttg1/bub3/bub1/bub1ba/zgc:162895/ccnd1/spdl1/fbxo43/msh6/chek1	33
GO:0034475	BP	GO:0034475	U4 snRNA 3'-end processing	8/4625	8/17035	2.94E-05	0.001903106	0.001782003	exosc9/exosc2/exosc6/exosc5/exosc8/exosc3/exosc7/exosc4	8
GO:0034587	BP	GO:0034587	piRNA metabolic process	8/4625	8/17035	2.94E-05	0.001903106	0.001782003	asz1/tdrd1/tdrd9/henmt1/piwil1/pld6/piwil2/exd1	8
GO:0022616	BP	GO:0022616	DNA strand elongation	12/4625	15/17035	3.05E-05	0.001956025	0.001831555	gins1/mcm3/mcm3l/mcm4/pola1/pcna/pole/lig1/pold3/dna2/pold2/mcm7	12
GO:0000469	BP	GO:0000469	cleavage involved in rRNA processing	13/4625	17/17035	3.22E-05	0.002045667	0.001915493	rrs1/exosc9/rps21/exosc2/rrp36/exosc10/abt1/eri1/exosc8/nhp2/gnl2/exosc3/exosc7	13
GO:1901987	BP	GO:1901987	regulation of cell cycle phase transition	41/4625	86/17035	3.71E-05	0.002332712	0.002184272	psme1/mad2l1/rbl1/anapc5/ppp1r7/cdc6/cdc25b/psme3/znf207a/zw10/cdc14b/dtl/nek10/cdk2/ccnd3/psme2/mad1l1/aurkb/plk3/orc1/nbn/ttk/abraxas1/cdc45/cdca5/cdc23/ticrr/rbl2/topbp1/mos/ndc80/mrnip/bub3/bub1/bub1ba/dbf4b/gnl2/zgc:162895/ccnd1/spdl1/chek1	41
GO:0043648	BP	GO:0043648	dicarboxylic acid metabolic process	24/4625	42/17035	4.02E-05	0.002475163	0.002317658	dhfr/dglucy/got2b/si:ch73-71d17.1/kmo/hal/nit2/gpt2l/zgc:92040/aldh4a1/mthfd1b/glsb/shmt1/aldh1l2/haao/aldh1l1/oat/zgc:172341/mrps36/prodha/kynu/me2/mdh1ab/shmt2	24
GO:1901991	BP	GO:1901991	negative regulation of mitotic cell cycle phase transition	24/4625	42/17035	4.02E-05	0.002475163	0.002317658	mad2l1/rbl1/cdc6/znf207a/zw10/dtl/mad1l1/aurkb/plk3/orc1/nbn/ttk/ticrr/rbl2/topbp1/ndc80/mrnip/bub3/bub1/bub1ba/zgc:162895/ccnd1/spdl1/chek1	24
GO:1905818	BP	GO:1905818	regulation of chromosome separation	18/4625	28/17035	4.32E-05	0.002634214	0.002466588	mad2l1/anapc5/ppp1r7/csnk2a2b/znf207a/zw10/mad1l1/aurkb/ttk/cdc23/mos/ndc80/pttg1/anapc1/bub3/bub1/bub1ba/spdl1	18
GO:1901990	BP	GO:1901990	regulation of mitotic cell cycle phase transition	37/4625	76/17035	4.97E-05	0.003003419	0.002812299	psme1/mad2l1/rbl1/anapc5/ppp1r7/cdc6/cdc25b/psme3/znf207a/zw10/cdc14b/dtl/cdk2/ccnd3/psme2/mad1l1/aurkb/plk3/orc1/nbn/ttk/cdc45/cdca5/cdc23/ticrr/rbl2/topbp1/ndc80/mrnip/bub3/bub1/bub1ba/gnl2/zgc:162895/ccnd1/spdl1/chek1	37
GO:0051306	BP	GO:0051306	mitotic sister chromatid separation	17/4625	26/17035	5.14E-05	0.003079463	0.002883504	mad2l1/anapc5/ppp1r7/znf207a/zw10/ncaph2/mad1l1/aurkb/ttk/cdc23/ndc80/pttg1/anapc1/bub3/bub1/bub1ba/spdl1	17
GO:0006400	BP	GO:0006400	tRNA modification	32/4625	63/17035	5.55E-05	0.003293606	0.00308402	lcmt2/mtfmt/adat3/trmt61a/elp4/trmt1/gtpbp3/ctu1/pus3/trmt44/tyw3/thg1l/trmt6/qtrt1/dph3/pus1/thada/nat10/nsun2/sephs1/alkbh8/elp6/trmt5/tyw5/mettl1/si:dkey-85a20.4/wdr4/thumpd2/trmt61b/thumpd1/trmt9b/trmt13	32
GO:0016071	BP	GO:0016071	mRNA metabolic process	147/4625	410/17035	5.80E-05	0.003411522	0.003194432	a1cf/scnm1/sfswap/ddx39aa/exosc9/supt6h/mrto4/cpeb1b/papola/snrpc/si:dkey-156n14.5/snrpb/esrp1/rbm39a/snrpd1/snrpd3/cwc22/ncbp2/tbp/ddx39ab/prpf19/u2af1/thoc7/ptbp2b/mbnl3/fxr2/dkc1/srsf6b/sf3b5/srsf1b/sf3b2/mbnl2/smn1/sf3b4/esrp2/snrpa/cstf3/ptbp1a/cnot8/cpsf4/pabpc1b/zfp36l1b/dnd1/fxr1/snu13b/lsm4/snrpa1/srsf3a/yju2/srsf5b/exosc2/cpsf2/pus3/pde12/rbm17/prkrip1/zmat5/snrnp27/exosc6/ddx39b/znrd1/…	147
GO:0030488	BP	GO:0030488	tRNA methylation	16/4625	24/17035	6.05E-05	0.003523452	0.003299241	lcmt2/trmt61a/trmt1/gtpbp3/trmt44/tyw3/trmt6/thada/nsun2/alkbh8/trmt5/mettl1/si:dkey-85a20.4/thumpd2/trmt61b/trmt13	16
GO:0006338	BP	GO:0006338	chromatin remodeling	45/4625	99/17035	6.91E-05	0.003988183	0.003734399	ruvbl1/zgc:173742/srcap/hmgb3b/phf8/smarca2/smarcb1b/smarca1/smarcad1a/npm1a/phf2/psme4b/kdm4aa/naa40/mbd1b/rbbp4/smarcb1a/nasp/setdb1a/piwil1/dmap1/cenpp/rnf8/smarca5/fam172a/npm2b/hmgb2b/ruvbl2/satb2/actl6a/ash1l/rrp8/mbd2/npm2a/bend3/top1/smarcd2/si:ch73-41e3.7/arid1b/oip5/actr5/hmgb1a/znfx1/actr8/dr1	45
GO:0000470	BP	GO:0000470	maturation of LSU-rRNA	15/4625	22/17035	7.00E-05	0.004004148	0.003749347	wdr12/pes/snu13b/znhit3/ddx18/rpl7l1/rpf2/mrpl1/urb1/las1l/bop1/nhp2/znhit6/gnl2/ftsj3	15
GO:0003006	BP	GO:0003006	developmental process involved in reproduction	57/4625	134/17035	8.31E-05	0.004714752	0.004414733	zgc:56699/gdf9/pde3a/smad2/tdrd1/tdrd9/ddx4/zp3e/ggt1b/psme4b/henmt1/zar1/ahr2/dnd1/ggt1a/trip13/macf1a/tdrd7a/cyp17a1/dazl/bmp15/zp3f.1/zp3b/zp3d.1/piwil1/cxcr4b/zp3a.1/zp3a.2/tert/mei4/rnf8/ccnb1/tsga10/zp3f.2/sass6/zpcx/hnrnpa3/pld6/lgr4/piwil2/alkbh5/ar/nanos3/zp3d.2/mettl14/dazap1/tdrd5/tdrd12/brca2/figla/zgc:173556/zgc:171778/zgc:194246/zp3c/buc/cfap157/si:ch211-225h24.2	57
GO:0051983	BP	GO:0051983	regulation of chromosome segregation	23/4625	41/17035	8.59E-05	0.004817002	0.004510476	mad2l1/anapc5/ppp1r7/csnk2a2b/znf207a/zw10/mad1l1/aurkb/ttk/wapla/cdca5/cdc23/lrmp/mos/ndc80/pttg1/anapc1/bub3/bub1/bub1ba/si:dkey-25o16.4/rmi2/spdl1	23
GO:0009123	BP	GO:0009123	nucleoside monophosphate metabolic process	25/4625	46/17035	8.64E-05	0.004817002	0.004510476	ak1/adss2/ada/aprt/ppat/uck2a/ak4/prtfdc1/umps/hprt1l/atic/adsl/uck2b/impdh1b/ampd3b/paics/dctd/upp1/tyms/ak3/nt5e/gmps/adss1/gart/ampd2a	25
GO:0006520	BP	GO:0006520	cellular amino acid metabolic process	84/4625	215/17035	8.85E-05	0.004892735	0.004581391	phgdh/tdh/dglucy/gcat/got2b/dct/gnmt/si:ch73-71d17.1/sars1/glud1a/kmo/upb1/wars2/ddc/psat1/hal/nit2/agxtb/lars1b/gpt2l/pah/zgc:92040/kyat1/enoph1/tph1a/ctps1a/nos2b/cthl/rars2/qrsl1/ido1/dao.3/dao.2/yars1/aldh8a1/pm20d1.1/aldh4a1/enosf1/acy1/arg2/glsb/cad/pars2/agxta/shmt1/rars1/bcat2/pipox/si:dkey-40g16.6/tph2/arg1/sephs1/agmat/plod1a/aimp1a/eprs1/pm20d1.2/otc/nos1/uroc1/gamt/cth/sdsl/haao/aldh5…	84
GO:0000463	BP	GO:0000463	maturation of LSU-rRNA from tricistronic rRNA transcript (SSU-rRNA, 5.8S rRNA, LSU-rRNA)	11/4625	14/17035	9.07E-05	0.00489899	0.004587247	wdr12/pes/znhit3/ddx18/rpl7l1/rpf2/urb1/bop1/znhit6/gnl2/ftsj3	11
GO:0090305	BP	GO:0090305	nucleic acid phosphodiester bond hydrolysis	36/4625	75/17035	9.07E-05	0.00489899	0.004587247	rrs1/dnase1l1/exosc9/dnase1l4.2/spo11/ercc4/dnase1l4.1/cpsf4/ercc2/dnase1l1l/rps21/exosc2/cpsf2/rrp36/elac2/znrd1/exosc10/polr3k/polr2i/rnaseh1/fip1l1a/abt1/mei4/eri1/elac1/dcp1b/mov10b.2/mov10b.1/fan1/exosc8/nhp2/dna2/rexo4/gnl2/exosc3/exosc7	36
GO:0001522	BP	GO:0001522	pseudouridine synthesis	12/4625	16/17035	9.17E-05	0.00489899	0.004587247	rpusd4/dkc1/trub2/pus3/pus7/pus1/naf1/rpusd2/nhp2/pus7l/gar1/nop10	12
GO:0035803	BP	GO:0035803	egg coat formation	12/4625	16/17035	9.17E-05	0.00489899	0.004587247	zp3e/zp3f.1/zp3b/zp3d.1/zp3a.1/zp3a.2/zp3f.2/zpcx/zp3d.2/zgc:173556/zgc:171778/zp3c	12
GO:0033045	BP	GO:0033045	regulation of sister chromatid segregation	20/4625	34/17035	0.000101179	0.005359999	0.00501892	mad2l1/anapc5/ppp1r7/znf207a/zw10/mad1l1/aurkb/ttk/wapla/cdca5/cdc23/mos/ndc80/pttg1/anapc1/bub3/bub1/bub1ba/rmi2/spdl1	20
GO:0006401	BP	GO:0006401	RNA catabolic process	56/4625	132/17035	0.000104143	0.00547175	0.00512356	rnaseh2b/exosc9/mrto4/fen1/mtrex/ncbp2/tbp/fxr2/lin28a/rnaseh2a/cnot8/pabpc1b/zfp36l1b/dnd1/fxr1/lsm4/exosc2/pde12/exosc6/dazl/rnaset2/exosc10/magoh/exosc5/zgc:114130/rnaseh1/lsm1/dcp1b/carhsp1/pnrc2/cnot6l/pelo/drosha/mettl16/cth1/rnaset2l/cnot10/exosc8/mettl14/tnrc6b/smg9/tnrc6c1/supv3l1/si:dkey-46g23.1/hnrnpa0a/patl2/rnaseh2c/qkia/exosc3/tent2/heatr1/exosc7/parn/rbm24a/exosc4/zgc:162730	56
GO:0050657	BP	GO:0050657	nucleic acid transport	32/4625	65/17035	0.000120156	0.006211291	0.005816041	rrs1/ddx19/rae1/ltv1/igf2bp3/nup35/ncbp2/thoc7/nmd3/eif6/ndc1/nup42/thoc6/thoc5/magoh/znf593/phax/ncbp3/lrmp/thoc3/nol6/igf2bp1/nxt2/alkbh5/slbp2/eny2/nup98/thoc1/qkia/slbp/rbm26/sdad1	32
GO:0050658	BP	GO:0050658	RNA transport	32/4625	65/17035	0.000120156	0.006211291	0.005816041	rrs1/ddx19/rae1/ltv1/igf2bp3/nup35/ncbp2/thoc7/nmd3/eif6/ndc1/nup42/thoc6/thoc5/magoh/znf593/phax/ncbp3/lrmp/thoc3/nol6/igf2bp1/nxt2/alkbh5/slbp2/eny2/nup98/thoc1/qkia/slbp/rbm26/sdad1	32
GO:0010965	BP	GO:0010965	regulation of mitotic sister chromatid separation	16/4625	25/17035	0.000125588	0.006389033	0.005982473	mad2l1/anapc5/ppp1r7/znf207a/zw10/mad1l1/aurkb/ttk/cdc23/ndc80/pttg1/anapc1/bub3/bub1/bub1ba/spdl1	16
GO:0044784	BP	GO:0044784	metaphase/anaphase transition of cell cycle	16/4625	25/17035	0.000125588	0.006389033	0.005982473	mad2l1/anapc5/ppp1r7/znf207a/zw10/mad1l1/aurkb/ttk/cdc23/mos/ndc80/anapc1/bub3/bub1/bub1ba/spdl1	16
GO:2000241	BP	GO:2000241	regulation of reproductive process	25/4625	47/17035	0.000137244	0.006861269	0.006424658	pde3a/smad2/cdc25b/wee2/ddx4/zp3e/ptbp1a/zar1/trip13/bmp15/zp3f.1/fbxo5/zp3b/zp3d.1/ttk/zp3a.1/zp3a.2/zp3f.2/zpcx/mos/zp3d.2/nanog/zgc:173556/zp3c/fbxo43	25
GO:0017144	BP	GO:0017144	drug metabolic process	100/4625	267/17035	0.000138003	0.006861269	0.006424658	ak1/hsd11b2/adss2/cyp11a1/ada/si:dkey-275b16.2/aprt/dhfr/spra/ak4/gnmt/si:ch73-71d17.1/sms/chia.4/kmo/npl/cyp2k31/ada2b/adsl/hal/gpx1a/agxtb/mpx/pah/pck2/cyp2ad2/cyp2p9/cyp2ad3/comtb/enoph1/aco1/cyp2u1/clybl/moxd1/nos2b/pcbd1/ampd3b/cyp17a1/nt5c1bb/dao.3/dao.2/si:ch211-226m16.2/mat2ab/tpk1/zgc:103559/mat1a/cyp2k22/cyp11c1/klf2a/cyp2n13/cyp2p6/cyp2p8/paox1/mmachc/cyp2x7/hbae5/hbbe2/zgc:163057/ada2…	100
GO:0019752	BP	GO:0019752	carboxylic acid metabolic process	169/4625	488/17035	0.000138082	0.006861269	0.006424658	phgdh/tdh/dhfr/acaa1/acsm3/dglucy/srcap/gcat/got2b/dct/elovl4a/gnmt/acat2/si:ch73-71d17.1/sars1/glud1a/kmo/uevld/npl/upb1/wars2/rdh10b/aacs/pfkpb/acox1/hsd17b12a/ddc/echdc2/psat1/hal/nit2/rbp1.1/mthfd1a/agxtb/hoga1/lars1b/fads2/gpt2l/aldocb/pah/lpin1/slc7a3a/pck2/zgc:92040/eno1a/kyat1/hao1/tpi1a/hagh/enoph1/csad/aco1/elovl4b/pfkpa/tph1a/prxl2b/ctps1a/lipg/rcor1/pparaa/nos2b/cthl/rars2/qrsl1/ido1/…	169
GO:0009161	BP	GO:0009161	ribonucleoside monophosphate metabolic process	23/4625	42/17035	0.000141349	0.006969588	0.006526084	ak1/adss2/ada/aprt/ppat/uck2a/ak4/prtfdc1/umps/hprt1l/atic/adsl/uck2b/impdh1b/ampd3b/paics/upp1/ak3/nt5e/gmps/adss1/gart/ampd2a	23
GO:0071103	BP	GO:0071103	DNA conformation change	54/4625	128/17035	0.000163247	0.007987896	0.007479593	nusap1/zgc:173742/ncapd2/phf8/ddx11/smarca1/phf2/psme4b/kat6a/pif1/ercc2/naa40/top2a/mbd1b/rbbp4/mcm6l/ncaph2/top2b/ncapd3/histh1l/h1-0/nasp/mcm4/nbn/setdb1a/piwil1/cenpp/wapla/cdca5/smarca5/fam172a/h1-10/chaf1b/mcm6/recql5/ncaph/chaf1a/ncapg/rrp8/shprh/mbd2/bend3/blm/si:ch211-103n10.5/top1/macroh2a2/si:ch73-41e3.7/zranb3/oip5/znfx1/mcm7/mcm2/h1m/top1mt	54
GO:0035162	BP	GO:0035162	embryonic hemopoiesis	40/4625	88/17035	0.000170762	0.008292292	0.007764619	slc40a1/tbx20/bmi1a/chrd/phf8/epc2/meis1b/smarca1/slc4a1a/gata1a/klf1/snrkb/tal1/nfe2/tspo/epb41b/sptb/csrnp1a/etnppl/cebpa/smad3a/alas2/cx43/chrac1/foxo3b/arrb1/csf3r/cicb/tmem88a/kdm6bb/aggf1/smyd5/dok2/tet2/lmo2/prdm15/tfr1a/twsg1b/nop10/jak2a	40
GO:0051236	BP	GO:0051236	establishment of RNA localization	32/4625	66/17035	0.000172977	0.00833669	0.007806192	rrs1/ddx19/rae1/ltv1/igf2bp3/nup35/ncbp2/thoc7/nmd3/eif6/ndc1/nup42/thoc6/thoc5/magoh/znf593/phax/ncbp3/lrmp/thoc3/nol6/igf2bp1/nxt2/alkbh5/slbp2/eny2/nup98/thoc1/qkia/slbp/rbm26/sdad1	32
GO:0090501	BP	GO:0090501	RNA phosphodiester bond hydrolysis	24/4625	45/17035	0.000176173	0.008427368	0.0078911	rrs1/exosc9/cpsf4/rps21/exosc2/cpsf2/rrp36/elac2/znrd1/exosc10/polr3k/polr2i/rnaseh1/fip1l1a/abt1/eri1/elac1/mov10b.2/mov10b.1/exosc8/nhp2/gnl2/exosc3/exosc7	24
GO:0045132	BP	GO:0045132	meiotic chromosome segregation	22/4625	40/17035	0.000180742	0.008581919	0.008035816	ercc4/top2a/trip13/top2b/nuf2/ttk/rmi1/mei4/wapla/birc5b/mus81/mos/espl1/pttg1/eme1/bub1/bub1ba/cenpx/si:dkey-57a22.11/zgc:194246/syce2/sgo1	22
GO:0051726	BP	GO:0051726	regulation of cell cycle	154/4625	442/17035	0.000194032	0.009145184	0.008563238	mnat1/psme1/spice1/nabp1a/mad2l1/skp2/nek2/rae1/ect2/fbxl18/ccnh/pdcd2/cks1b/rbl1/anapc5/dlg1/ppp1r7/cdc6/cdc25b/cdkn1ca/kif11/ccna2/sirt2/psme3/aurka/wee2/gadd45bb/csnk2a2b/ddx4/znf207a/phactr4a/rab11fip3/cables2b/ccng2/rnf167/zw10/pes/plk2b/cdc14b/dtl/top2a/stil/trip13/nek10/chek2/cdk2/btg1/ccnd3/gadd45ba/lin9/cdkn1ba/psme2/mdm2/mad1l1/top2b/btg4/rgcc/gmnn/tipin/ccnb2/ssrp1a/aurkb/plk3/e2f5/fbx…	154
GO:0043900	BP	GO:0043900	regulation of multi-organism process	17/4625	28/17035	0.000197198	0.009226582	0.008639456	pde3a/smad2/zp3e/ptbp1a/zar1/bmp15/zp3f.1/zp3b/zp3d.1/zp3a.1/zp3a.2/zp3f.2/zpcx/zp3d.2/nanog/zgc:173556/zp3c	17
GO:0000491	BP	GO:0000491	small nucleolar ribonucleoprotein complex assembly	8/4625	9/17035	0.000200774	0.009258721	0.008669551	ruvbl1/pih1d2/znhit3/ruvbl2/naf1/shq1/znhit6/nufip1	8
GO:0031125	BP	GO:0031125	rRNA 3'-end processing	8/4625	9/17035	0.000200774	0.009258721	0.008669551	exosc9/rps21/exosc2/exosc10/eri1/exosc8/exosc3/exosc7	8
GO:0007051	BP	GO:0007051	spindle organization	38/4625	83/17035	0.000204682	0.009275873	0.008685611	kifc1/spice1/kif4/nek2/rae1/kif11/aurka/tubgcp2/kif23/znf207a/haus4/haus5/ntmt1/stil/tubgcp3/nuf2/si:dkey-170l10.1/haus7/aurkb/bora/lrmp/birc5b/sass6/haus1/haus3/si:zfos-452g4.1/ndc80/tacc1/birc5a/tpx2/si:ch211-153a8.4/cenpw/cenph/dync1li1/abraxas2/mapre2/haus6/cep72	38
GO:0034472	BP	GO:0034472	snRNA 3'-end processing	13/4625	19/17035	0.000206934	0.009275873	0.008685611	exosc9/ints6l/ints7/exosc2/exosc6/exosc5/ints14/exosc8/toe1/ints12/exosc3/exosc7/exosc4	13
GO:0051985	BP	GO:0051985	negative regulation of chromosome segregation	13/4625	19/17035	0.000206934	0.009275873	0.008685611	mad2l1/znf207a/zw10/mad1l1/aurkb/ttk/mos/ndc80/pttg1/bub3/bub1/bub1ba/spdl1	13
GO:1905819	BP	GO:1905819	negative regulation of chromosome separation	13/4625	19/17035	0.000206934	0.009275873	0.008685611	mad2l1/znf207a/zw10/mad1l1/aurkb/ttk/mos/ndc80/pttg1/bub3/bub1/bub1ba/spdl1	13
GO:0090407	BP	GO:0090407	organophosphate biosynthetic process	113/4625	311/17035	0.000218909	0.00974448	0.009124399	ak1/adss2/ada/pank2/aprt/mvk/ppat/uck2a/agpat9l/ak4/elovl4a/nadk2/kmo/itpkb/pank1b/lpcat1/prtfdc1/umps/ptdss1a/rrm1/gucy2c/chpt1/adcy2b/hprt1l/gpat3/ckmt1/atic/adsl/pik3cg/npr1b/mbip/cds1/ip6k2b/cmpk/idi1/cept1b/uck2b/pigm/tpi1a/elovl4b/naprt/impdh1b/nampta/ctps1a/ak8/nos2b/ampd3b/paics/ido1/pld2/sgms2b/dctd/crls1/tpk1/pigq/aspdh/pigh/elovl6l/ckmb/upp1/fdps/cad/itpka/tyms/ckbb/mppe1/zgc:162634/dt…	113
GO:0080154	BP	GO:0080154	regulation of fertilization	12/4625	17/17035	0.000234465	0.010364952	0.009705388	zp3e/ptbp1a/zp3f.1/zp3b/zp3d.1/zp3a.1/zp3a.2/zp3f.2/zpcx/zp3d.2/zgc:173556/zp3c	12
GO:0051784	BP	GO:0051784	negative regulation of nuclear division	16/4625	26/17035	0.000244281	0.010651996	0.009974165	mad2l1/znf207a/zw10/trip13/mad1l1/aurkb/fbxo5/ttk/mos/ndc80/pttg1/bub3/bub1/bub1ba/spdl1/fbxo43	16
GO:2000243	BP	GO:2000243	positive regulation of reproductive process	16/4625	26/17035	0.000244281	0.010651996	0.009974165	pde3a/smad2/cdc25b/zp3e/ptbp1a/zar1/zp3f.1/zp3b/zp3d.1/zp3a.1/zp3a.2/zp3f.2/zpcx/zp3d.2/zgc:173556/zp3c	16
GO:0071027	BP	GO:0071027	nuclear RNA surveillance	9/4625	11/17035	0.000250792	0.01078911	0.010102554	exosc9/exosc2/exosc6/exosc10/exosc5/exosc8/exosc3/exosc7/exosc4	9
GO:0071028	BP	GO:0071028	nuclear mRNA surveillance	9/4625	11/17035	0.000250792	0.01078911	0.010102554	exosc9/exosc2/exosc6/exosc10/exosc5/exosc8/exosc3/exosc7/exosc4	9
GO:0015931	BP	GO:0015931	nucleobase-containing compound transport	38/4625	84/17035	0.000276854	0.011830894	0.011078045	rrs1/ddx19/rae1/ltv1/igf2bp3/nup35/ncbp2/thoc7/nmd3/eif6/slc35a3b/ndc1/nup42/thoc6/slc35b1/thoc5/magoh/slc25a36a/znf593/phax/ncbp3/lrmp/slc29a1b/thoc3/nol6/igf2bp1/nxt2/slc35a4/alkbh5/slbp2/eny2/nup98/slc29a3/thoc1/qkia/slbp/rbm26/sdad1	38
GO:0000086	BP	GO:0000086	G2/M transition of mitotic cell cycle	18/4625	31/17035	0.000282168	0.011978134	0.011215916	skp2/fbxl18/cdc6/cdc25b/dtl/cdk2/ensaa/aurkb/orc1/nbn/ticrr/mastl/topbp1/mrnip/zgc:162895/ccnd1/kdm8/chek1	18
GO:0051783	BP	GO:0051783	regulation of nuclear division	27/4625	54/17035	0.000289834	0.012222589	0.011444815	mad2l1/nek2/pdcd2/anapc5/ppp1r7/wee2/znf207a/zw10/cdc14b/trip13/mad1l1/aurkb/fbxo5/ttk/bora/cdca5/cdc23/mos/ndc80/pttg1/anapc1/bub3/bub1/bub1ba/gnl2/spdl1/fbxo43	27
GO:0007091	BP	GO:0007091	metaphase/anaphase transition of mitotic cell cycle	15/4625	24/17035	0.00030077	0.012358569	0.011572142	mad2l1/anapc5/ppp1r7/znf207a/zw10/mad1l1/aurkb/ttk/cdc23/ndc80/anapc1/bub3/bub1/bub1ba/spdl1	15
GO:0009127	BP	GO:0009127	purine nucleoside monophosphate biosynthetic process	15/4625	24/17035	0.00030077	0.012358569	0.011572142	adss2/ada/aprt/ppat/prtfdc1/hprt1l/atic/adsl/impdh1b/ampd3b/paics/gmps/adss1/gart/ampd2a	15
GO:0009168	BP	GO:0009168	purine ribonucleoside monophosphate biosynthetic process	15/4625	24/17035	0.00030077	0.012358569	0.011572142	adss2/ada/aprt/ppat/prtfdc1/hprt1l/atic/adsl/impdh1b/ampd3b/paics/gmps/adss1/gart/ampd2a	15
GO:1902099	BP	GO:1902099	regulation of metaphase/anaphase transition of cell cycle	15/4625	24/17035	0.00030077	0.012358569	0.011572142	mad2l1/anapc5/ppp1r7/znf207a/zw10/mad1l1/aurkb/ttk/cdc23/mos/ndc80/bub3/bub1/bub1ba/spdl1	15
GO:0008380	BP	GO:0008380	RNA splicing	91/4625	244/17035	0.000317346	0.012956609	0.012132127	scnm1/sfswap/ddx39aa/rtraf/snrpc/si:dkey-156n14.5/snrpb/esrp1/snrpd1/snrpd3/cwc22/ncbp2/ddx39ab/prpf19/u2af1/thoc7/mbnl3/srsf6b/sf3b5/srsf1b/sf3b2/mbnl2/smn1/sf3b4/esrp2/snrpa/snu13b/dyrk1ab/lsm4/snrpa1/srsf3a/yju2/srsf5b/rbm17/prkrip1/zmat5/snrnp27/ddx39b/txnl4a/rbm4.1/thoc6/thoc5/magoh/prpf38a/snrpb2/coil/snrpd2/usp39/wtap/si:dkey-86e18.1/prmt7/fam172a/mbnl1/gemin8/mettl16/sf3b1/trnau1apb/dbr1/…	91
GO:0016054	BP	GO:0016054	organic acid catabolic process	56/4625	137/17035	0.000333724	0.01345391	0.012597782	tdh/acaa1/gcat/got2b/acat2/si:ch73-71d17.1/kmo/npl/acox1/echdc2/hal/hoga1/gpt2l/pah/lpin1/pck2/zgc:92040/hao1/nos2b/ido1/dao.3/dao.2/aldh8a1/hyal3/aldh4a1/enosf1/arg2/glsb/shmt1/pipox/si:dkey-40g16.6/arg1/lpin2/cpt1ab/gusb/nos1/ehhadh/aldh1l2/uroc1/sdsl/tysnd1/haao/aldh5a1/aldh1l1/oat/zgc:172341/phyh/prodha/qdprb2/zgc:171517/gcsha/kynu/etfa/hibadha/shmt2/gcshb	56
GO:0046395	BP	GO:0046395	carboxylic acid catabolic process	56/4625	137/17035	0.000333724	0.01345391	0.012597782	tdh/acaa1/gcat/got2b/acat2/si:ch73-71d17.1/kmo/npl/acox1/echdc2/hal/hoga1/gpt2l/pah/lpin1/pck2/zgc:92040/hao1/nos2b/ido1/dao.3/dao.2/aldh8a1/hyal3/aldh4a1/enosf1/arg2/glsb/shmt1/pipox/si:dkey-40g16.6/arg1/lpin2/cpt1ab/gusb/nos1/ehhadh/aldh1l2/uroc1/sdsl/tysnd1/haao/aldh5a1/aldh1l1/oat/zgc:172341/phyh/prodha/qdprb2/zgc:171517/gcsha/kynu/etfa/hibadha/shmt2/gcshb	56
GO:0009063	BP	GO:0009063	cellular amino acid catabolic process	37/4625	82/17035	0.000352472	0.013910343	0.013025171	tdh/gcat/got2b/si:ch73-71d17.1/kmo/hal/gpt2l/pah/zgc:92040/nos2b/ido1/dao.3/dao.2/aldh8a1/aldh4a1/enosf1/arg2/glsb/shmt1/pipox/si:dkey-40g16.6/arg1/nos1/uroc1/sdsl/haao/aldh5a1/oat/zgc:172341/prodha/qdprb2/zgc:171517/gcsha/kynu/hibadha/shmt2/gcshb	37
GO:0097549	BP	GO:0097549	chromatin organization involved in negative regulation of transcription	23/4625	44/17035	0.000352895	0.013910343	0.013025171	bmi1a/phf8/bmi1b/phf2/naa40/mbd1b/histh1l/h1-0/setdb1a/chrac1/cdc45/fam172a/h1-10/atad2b/dot1l/rrp8/mbd2/bend3/si:ch211-103n10.5/si:ch73-41e3.7/eed/znfx1/h1m	23
GO:0006913	BP	GO:0006913	nucleocytoplasmic transport	44/4625	102/17035	0.000353726	0.013910343	0.013025171	nup155/rrs1/ddx19/anp32a/cse1l/rae1/ltv1/nup35/nutf2l/ncbp2/lsg1/thoc7/nmd3/fam53b/kpna1/ipo9/nup50/eif6/kpna7/nup188/nup58/heatr3/kpna2/thoc5/kpnb3/ipo4/kpna5/znf593/phax/zgc:175066/kpna3/thoc3/nol6/nxt2/alkbh5/rpain/eny2/nup98/si:ch73-182a11.2/thoc1/pttg1ipa/si:dkeyp-20g2.3/rbm26/sdad1	44
GO:0051169	BP	GO:0051169	nuclear transport	44/4625	102/17035	0.000353726	0.013910343	0.013025171	nup155/rrs1/ddx19/anp32a/cse1l/rae1/ltv1/nup35/nutf2l/ncbp2/lsg1/thoc7/nmd3/fam53b/kpna1/ipo9/nup50/eif6/kpna7/nup188/nup58/heatr3/kpna2/thoc5/kpnb3/ipo4/kpna5/znf593/phax/zgc:175066/kpna3/thoc3/nol6/nxt2/alkbh5/rpain/eny2/nup98/si:ch73-182a11.2/thoc1/pttg1ipa/si:dkeyp-20g2.3/rbm26/sdad1	44
GO:0030218	BP	GO:0030218	erythrocyte differentiation	45/4625	105/17035	0.000363359	0.014202027	0.013298293	slc40a1/spi1b/pink1/kmt2a/phf8/epc2/pdcd2/jak3/smarca1/slc4a1a/gata1a/klf3/klf1/tal1/nfe2/ncoa4/rps27.1/tspo/epb41b/klf6a/sptb/melk/flvcr1/alas2/klf17/chrac1/lpar2a/tert/cicb/kdm6bb/adnp2a/abcc5/abcb10/rasa3/atp5if1a/klf9/smim1/dok2/tet2/gfi1b/lmo2/hemgn/prdm15/tfr1a/jak2a	45
GO:0032103	BP	GO:0032103	positive regulation of response to external stimulus	21/4625	39/17035	0.000373224	0.014499204	0.01357656	hmgb3b/tlr3/cgas/tnc/vegfab/tdgf1/cxcl12a/cxcr4b/mmp9/hmgb2b/cxcl12b/lrsam1/mavs/tlr8b/tlr8a/sting1/hmgb1a/tlr1/csf1ra/vegfaa/il6st	21
GO:0016078	BP	GO:0016078	tRNA catabolic process	6/4625	6/17035	0.000399568	0.014719727	0.01378305	exosc9/exosc2/exosc10/exosc8/exosc3/exosc7	6
GO:0043046	BP	GO:0043046	DNA methylation involved in gamete generation	6/4625	6/17035	0.000399568	0.014719727	0.01378305	tdrd1/tdrd9/prmt7/pld6/piwil2/tdrd5	6
GO:0043633	BP	GO:0043633	polyadenylation-dependent RNA catabolic process	6/4625	6/17035	0.000399568	0.014719727	0.01378305	exosc9/exosc2/exosc10/exosc8/exosc3/exosc7	6
GO:0043634	BP	GO:0043634	polyadenylation-dependent ncRNA catabolic process	6/4625	6/17035	0.000399568	0.014719727	0.01378305	exosc9/exosc2/exosc10/exosc8/exosc3/exosc7	6
GO:0071029	BP	GO:0071029	nuclear ncRNA surveillance	6/4625	6/17035	0.000399568	0.014719727	0.01378305	exosc9/exosc2/exosc10/exosc8/exosc3/exosc7	6
GO:0071035	BP	GO:0071035	nuclear polyadenylation-dependent rRNA catabolic process	6/4625	6/17035	0.000399568	0.014719727	0.01378305	exosc9/exosc2/exosc10/exosc8/exosc3/exosc7	6
GO:0071038	BP	GO:0071038	nuclear polyadenylation-dependent tRNA catabolic process	6/4625	6/17035	0.000399568	0.014719727	0.01378305	exosc9/exosc2/exosc10/exosc8/exosc3/exosc7	6
GO:0071046	BP	GO:0071046	nuclear polyadenylation-dependent ncRNA catabolic process	6/4625	6/17035	0.000399568	0.014719727	0.01378305	exosc9/exosc2/exosc10/exosc8/exosc3/exosc7	6
GO:0071051	BP	GO:0071051	polyadenylation-dependent snoRNA 3'-end processing	6/4625	6/17035	0.000399568	0.014719727	0.01378305	exosc2/exosc6/exosc10/exosc5/exosc3/exosc4	6
GO:1901605	BP	GO:1901605	alpha-amino acid metabolic process	59/4625	147/17035	0.000414898	0.015197106	0.014230051	phgdh/tdh/dglucy/gcat/got2b/dct/gnmt/si:ch73-71d17.1/kmo/psat1/hal/nit2/agxtb/gpt2l/pah/zgc:92040/kyat1/enoph1/ctps1a/nos2b/cthl/ido1/dao.3/dao.2/aldh8a1/aldh4a1/arg2/glsb/cad/agxta/shmt1/bcat2/pipox/arg1/sephs1/agmat/plod1a/otc/nos1/uroc1/gamt/cth/sdsl/haao/oat/zgc:172341/gmps/prodha/qdprb2/zgc:171517/gcsha/pycr1b/kynu/aldh18a1/kyat3/hibadha/ass1/shmt2/gcshb	59
GO:0006305	BP	GO:0006305	DNA alkylation	13/4625	20/17035	0.000444137	0.016084281	0.015060772	tdrd1/tdrd9/dnmt1/dnmt3bb.1/unga/cebpb/pou5f3/prmt7/hells/dnmt3bb.2/pld6/piwil2/tdrd5	13
GO:0006306	BP	GO:0006306	DNA methylation	13/4625	20/17035	0.000444137	0.016084281	0.015060772	tdrd1/tdrd9/dnmt1/dnmt3bb.1/unga/cebpb/pou5f3/prmt7/hells/dnmt3bb.2/pld6/piwil2/tdrd5	13
GO:0034101	BP	GO:0034101	erythrocyte homeostasis	45/4625	106/17035	0.000467227	0.016825433	0.015754761	slc40a1/spi1b/pink1/kmt2a/phf8/epc2/pdcd2/jak3/smarca1/slc4a1a/gata1a/klf3/klf1/tal1/nfe2/ncoa4/rps27.1/tspo/epb41b/klf6a/sptb/melk/flvcr1/alas2/klf17/chrac1/lpar2a/tert/cicb/kdm6bb/adnp2a/abcc5/abcb10/rasa3/atp5if1a/klf9/smim1/dok2/tet2/gfi1b/lmo2/hemgn/prdm15/tfr1a/jak2a	45
GO:0044839	BP	GO:0044839	cell cycle G2/M phase transition	20/4625	37/17035	0.000479605	0.017174682	0.016081787	skp2/fbxl18/cdc6/cdc25b/dtl/nek10/cdk2/ensaa/aurkb/orc1/nbn/abraxas1/ticrr/mastl/topbp1/mrnip/zgc:162895/ccnd1/kdm8/chek1	20
GO:0044282	BP	GO:0044282	small molecule catabolic process	75/4625	197/17035	0.000510928	0.018143106	0.016988586	gale/tdh/ada/galk2/cyp46a1.2/acaa1/rpe/gcat/got2b/acat2/si:ch73-71d17.1/kmo/npl/cyp46a1.1/pfkpb/pgm1/acox1/ada2b/echdc2/hal/hoga1/gpt2l/pah/lpin1/hddc3/pck2/zgc:92040/hao1/synj1/tpi1a/hagh/pfkpa/nos2b/ido1/dao.3/dao.2/aldh8a1/hyal3/aldh4a1/enosf1/arg2/glsb/srd5a3/ada2a/shmt1/inpp5l/pipox/si:dkey-40g16.6/arg1/lpin2/cpt1ab/gusb/nos1/ehhadh/aldh1l2/uroc1/ptena/sdsl/tysnd1/haao/aldh5a1/aldh1l1/oat/zg…	75
GO:0007339	BP	GO:0007339	binding of sperm to zona pellucida	12/4625	18/17035	0.000529292	0.018143106	0.016988586	zp3e/zp3f.1/zp3b/zp3d.1/zp3a.1/zp3a.2/zp3f.2/zpcx/zp3d.2/zgc:173556/zgc:171778/zp3c	12
GO:0007340	BP	GO:0007340	acrosome reaction	12/4625	18/17035	0.000529292	0.018143106	0.016988586	stx2a/zp3e/zp3f.1/zp3b/zp3d.1/zp3a.1/zp3a.2/zp3f.2/zpcx/zp3d.2/zgc:173556/zp3c	12
GO:0033046	BP	GO:0033046	negative regulation of sister chromatid segregation	12/4625	18/17035	0.000529292	0.018143106	0.016988586	mad2l1/znf207a/zw10/mad1l1/aurkb/ttk/ndc80/pttg1/bub3/bub1/bub1ba/spdl1	12
GO:0033048	BP	GO:0033048	negative regulation of mitotic sister chromatid segregation	12/4625	18/17035	0.000529292	0.018143106	0.016988586	mad2l1/znf207a/zw10/mad1l1/aurkb/ttk/ndc80/pttg1/bub3/bub1/bub1ba/spdl1	12
GO:0046112	BP	GO:0046112	nucleobase biosynthetic process	12/4625	18/17035	0.000529292	0.018143106	0.016988586	ada/aprt/ppat/prtfdc1/umps/hprt1l/cmpk/ctps1a/mthfd1b/cad/shmt1/gart	12
GO:1902100	BP	GO:1902100	negative regulation of metaphase/anaphase transition of cell cycle	12/4625	18/17035	0.000529292	0.018143106	0.016988586	mad2l1/znf207a/zw10/mad1l1/aurkb/ttk/mos/ndc80/bub3/bub1/bub1ba/spdl1	12
GO:2000816	BP	GO:2000816	negative regulation of mitotic sister chromatid separation	12/4625	18/17035	0.000529292	0.018143106	0.016988586	mad2l1/znf207a/zw10/mad1l1/aurkb/ttk/ndc80/pttg1/bub3/bub1/bub1ba/spdl1	12
GO:0007052	BP	GO:0007052	mitotic spindle organization	23/4625	45/17035	0.00053765	0.018234578	0.017074237	kifc1/spice1/kif4/nek2/rae1/kif11/aurka/kif23/znf207a/stil/nuf2/aurkb/bora/lrmp/birc5b/sass6/ndc80/tacc1/birc5a/tpx2/cenph/dync1li1/abraxas2	23
GO:0042133	BP	GO:0042133	neurotransmitter metabolic process	23/4625	45/17035	0.00053765	0.018234578	0.017074237	upb1/hnmt/agxtb/mao/comtb/tph1a/moxd1/nos2b/enpp6/klf2a/agxta/shmt1/rnf180/tph2/dagla/nos1/dbh/aldh5a1/daglb/gcsha/slc44a4/shmt2/gcshb	23
GO:1901606	BP	GO:1901606	alpha-amino acid catabolic process	34/4625	75/17035	0.000541445	0.018266628	0.017104247	tdh/gcat/got2b/si:ch73-71d17.1/kmo/hal/gpt2l/pah/zgc:92040/nos2b/ido1/dao.3/dao.2/aldh8a1/aldh4a1/arg2/glsb/shmt1/pipox/arg1/nos1/uroc1/sdsl/haao/oat/zgc:172341/prodha/qdprb2/zgc:171517/gcsha/kynu/hibadha/shmt2/gcshb	34
GO:0009124	BP	GO:0009124	nucleoside monophosphate biosynthetic process	21/4625	40/17035	0.000585968	0.019665199	0.018413821	adss2/ada/aprt/ppat/uck2a/prtfdc1/umps/hprt1l/atic/adsl/uck2b/impdh1b/ampd3b/paics/dctd/upp1/tyms/gmps/adss1/gart/ampd2a	21
GO:0042737	BP	GO:0042737	drug catabolic process	45/4625	107/17035	0.000596765	0.019923256	0.018655457	ada/si:dkey-275b16.2/chia.4/npl/cyp2k31/ada2b/gpx1a/pah/pck2/cyp2ad2/cyp2p9/cyp2ad3/cyp2u1/moxd1/dao.3/dao.2/si:ch211-226m16.2/zgc:103559/cyp2k22/cyp2n13/cyp2p6/cyp2p8/paox1/cyp2x7/hbae5/hbbe2/zgc:163057/ada2a/prdx5/pipox/prdx1/prdx4/dbh/hbba2/hbaa2/nt5e/qdprb2/zgc:171517/gcsha/chia.6/cyp2j20/cyp2k8/cyp2y3/cyp2k19/gcshb	45
GO:0010212	BP	GO:0010212	response to ionizing radiation	19/4625	35/17035	0.000616472	0.020301705	0.019009824	nabp1a/xrcc4/inip/mdm2/abraxas1/nabp1b/rnf8/ticrr/badb/rad9a/bbc3/xrcc6/mrnip/rad9b/cdkn1a/si:ch73-352p4.5/si:dkey-9i23.15/si:dkey-249d8.1/xrcc5	19
GO:0030225	BP	GO:0030225	macrophage differentiation	11/4625	16/17035	0.000618261	0.020301705	0.019009824	spi1b/ncor2/gata1a/csf3r/slc7a7/irf8/flt3/nrros/il34/csf3b/csf1ra	11
GO:0031507	BP	GO:0031507	heterochromatin assembly	11/4625	16/17035	0.000618261	0.020301705	0.019009824	phf8/phf2/naa40/mbd1b/setdb1a/fam172a/rrp8/mbd2/bend3/si:ch73-41e3.7/znfx1	11
GO:0034401	BP	GO:0034401	chromatin organization involved in regulation of transcription	24/4625	48/17035	0.00062077	0.020301705	0.019009824	bmi1a/phf8/bmi1b/phf2/naa40/mbd1b/histh1l/h1-0/setdb1a/chrac1/cdc45/fam172a/h1-10/atad2b/dot1l/rrp8/mbd2/bend3/si:ch211-103n10.5/si:ch73-41e3.7/zmiz2/eed/znfx1/h1m	24
GO:0000459	BP	GO:0000459	exonucleolytic trimming involved in rRNA processing	7/4625	8/17035	0.000661292	0.021408497	0.020046186	exosc9/exosc2/exosc10/eri1/exosc8/exosc3/exosc7	7
GO:0000467	BP	GO:0000467	exonucleolytic trimming to generate mature 3'-end of 5.8S rRNA from tricistronic rRNA transcript (SSU-rRNA, 5.8S rRNA, LSU-rRNA)	7/4625	8/17035	0.000661292	0.021408497	0.020046186	exosc9/exosc2/exosc10/eri1/exosc8/exosc3/exosc7	7
GO:0030071	BP	GO:0030071	regulation of mitotic metaphase/anaphase transition	14/4625	23/17035	0.000704699	0.022699101	0.021254664	mad2l1/anapc5/ppp1r7/znf207a/zw10/mad1l1/aurkb/ttk/cdc23/ndc80/bub3/bub1/bub1ba/spdl1	14
GO:0000077	BP	GO:0000077	DNA damage checkpoint	20/4625	38/17035	0.000755751	0.024221829	0.022680494	dtl/chek2/tipin/nbn/rad1/abraxas1/ticrr/wdr76/rad9a/dot1l/atrip/mus81/mrnip/etaa1/rad9b/eme1/si:ch73-352p4.5/zgc:162895/ccnd1/chek1	20
GO:0034427	BP	GO:0034427	nuclear-transcribed mRNA catabolic process, exonucleolytic, 3'-5'	8/4625	10/17035	0.000762857	0.024327929	0.022779842	exosc9/exosc2/exosc6/exosc5/exosc8/exosc3/exosc7/exosc4	8
GO:1902850	BP	GO:1902850	microtubule cytoskeleton organization involved in mitosis	30/4625	65/17035	0.000780732	0.024643559	0.023075388	kifc1/nusap1/spice1/kif4/nek2/rae1/kif11/ndel1a/aurka/kif23/znf207a/stil/nuf2/aurkb/bora/lrmp/birc5b/sass6/ccdc151/ndc80/tacc1/birc5a/diaph2/tpx2/rhoab/cenph/dync1li1/abraxas2/spdl1/antxr2a	30
GO:2001251	BP	GO:2001251	negative regulation of chromosome organization	26/4625	54/17035	0.00078222	0.024643559	0.023075388	noc2l/mad2l1/supt6h/phf8/znf207a/phf2/zw10/mad1l1/histh1l/aurkb/h1-0/ttk/h1-10/terf1/atad2b/prmt6/ndc80/pttg1/bub3/bub1/si:ch211-103n10.5/acd/bub1ba/mcm2/h1m/spdl1	26
GO:0006383	BP	GO:0006383	transcription by RNA polymerase III	16/4625	28/17035	0.000784288	0.024643559	0.023075388	brf2/brf1b/polr3f/maf1/polr3glb/tbp/polr3g/snapc1a/tbpl1/polr3k/polr2h/gtf3c6/gtf3c5/ice2/tbpl2/polr3d	16
GO:0043434	BP	GO:0043434	response to peptide hormone	37/4625	85/17035	0.000819881	0.025511829	0.023888406	grb10a/cyp11a1/stat1a/ghrb/cpeb1b/stat6/phip/gsk3ba/pik3r2/lpin1/pck2/stat3/foxo3a/stat4/khk/baiap2l1b/stat2/pik3r3b/si:ch73-335l21.1/slc2a12/irs2a/pik3r1/cyp11c1/foxo3b/nr4a2b/socs2/lpin2/rab8b/meak7/lepr/irs2b/stat1b/kl/znf106b/cyp11a2/foxo1a/inpp5ka	37
GO:1901652	BP	GO:1901652	response to peptide	37/4625	85/17035	0.000819881	0.025511829	0.023888406	grb10a/cyp11a1/stat1a/ghrb/cpeb1b/stat6/phip/gsk3ba/pik3r2/lpin1/pck2/stat3/foxo3a/stat4/khk/baiap2l1b/stat2/pik3r3b/si:ch73-335l21.1/slc2a12/irs2a/pik3r1/cyp11c1/foxo3b/nr4a2b/socs2/lpin2/rab8b/meak7/lepr/irs2b/stat1b/kl/znf106b/cyp11a2/foxo1a/inpp5ka	37
GO:0072593	BP	GO:0072593	reactive oxygen species metabolic process	27/4625	57/17035	0.000858649	0.026589095	0.024897122	pink1/ncf2/myh11a/sirt2/gpx1a/cyba/mpx/nos2b/ncf1/romo1/ncf4/noxo1a/klf2a/hbae5/hbbe2/zgc:163057/prdx5/cybb/prdx1/nos1/prdx4/hbba2/hbaa2/acod1/nrros/sod3b/ccs	27
GO:0044773	BP	GO:0044773	mitotic DNA damage checkpoint	13/4625	21/17035	0.000876406	0.027008469	0.025289808	dtl/chek2/tipin/nbn/ticrr/rad9a/mus81/mrnip/rad9b/eme1/zgc:162895/ccnd1/chek1	13
GO:0015711	BP	GO:0015711	organic anion transport	84/4625	229/17035	0.000948837	0.029071598	0.027221652	slc7a9/slc7a10a/atp11a/slc10a4/tmem30c/slc38a5a/slc38a7/slc6a6a/slc4a1a/slc4a4a/si:dkey-246g23.4/slc16a9a/slc38a5b/slc10a2/slc23a1/pitpnbl/slc3a1/slc16a12a/slc6a9/slc7a3a/slc25a55a/slc26a5/pitpnc1b/slc4a2a/slc26a1/tmem30aa/mfsd2aa/stard14/slc19a1/mfsd2ab/slc7a2/zgc:103678/slc35b1/pitpnaa/xkr8.3/slc13a5b/slc52a3/slc16a4/slc4a4b/slc16a3/slc13a1/slc38a2/slc27a6/zgc:114041/tmem30b/slc38a6/slco2b1/slc…	84
GO:1901293	BP	GO:1901293	nucleoside phosphate biosynthetic process	69/4625	182/17035	0.000952424	0.029071598	0.027221652	ak1/adss2/ada/pank2/aprt/ppat/uck2a/agpat9l/ak4/elovl4a/nadk2/kmo/pank1b/prtfdc1/umps/rrm1/gucy2c/adcy2b/hprt1l/gpat3/atic/adsl/npr1b/cds1/cmpk/uck2b/elovl4b/naprt/impdh1b/nampta/ctps1a/ak8/nos2b/ampd3b/paics/ido1/dctd/aspdh/elovl6l/upp1/cad/tyms/dtymk/atp5mc1/papss2b/ak3/dcakd/ATP8/ATP6/nppc/cox5b2/nos1/elovl7a/haao/rrm2/gmps/nme4/nme8/nme2b.2/adss1/kynu/elovl1a/tamm41/elovl7b/adcy9/gart/elovl1b…	69
GO:0032922	BP	GO:0032922	circadian regulation of gene expression	15/4625	26/17035	0.000998901	0.030345768	0.028414741	mycbp2/nr1d2a/bhlhe40/per3/per1b/nampta/nr1d1/egr1/bhlhe41/per1a/noctb/nfil3-6/nfil3-5/ppp1cbl/kdm8	15
GO:0035036	BP	GO:0035036	sperm-egg recognition	12/4625	19/17035	0.001081905	0.032712304	0.030630685	zp3e/zp3f.1/zp3b/zp3d.1/zp3a.1/zp3a.2/zp3f.2/zpcx/zp3d.2/zgc:173556/zgc:171778/zp3c	12
GO:0009117	BP	GO:0009117	nucleotide metabolic process	100/4625	281/17035	0.001090718	0.03282395	0.030735227	ak1/adss2/ada/pank2/aprt/mvk/ppat/acsm3/rnaseh2b/dera/uck2a/agpat9l/ak4/elovl4a/nadk2/nudt17/kmo/pank1b/prtfdc1/umps/pfkpb/rrm1/gucy2c/adcy2b/hprt1l/gpat3/gmpr/atic/adsl/npr1b/cds1/aldocb/cmpk/hddc3/uck2b/eno1a/tpi1a/elovl4b/naprt/pfkpa/impdh1b/guk1a/nampta/ctps1a/nos2b/ampd3b/paics/ido1/nt5c1bb/dctd/aspdh/elovl6l/hkdc1/hk1/gapdhs/upp1/cad/pklr/tyms/suclg2/mcee/dtymk/aldob/dctpp1/pipox/atp5mc1/pa…	100
GO:0006820	BP	GO:0006820	anion transport	115/4625	330/17035	0.001164678	0.034885931	0.032665995	slc22a4/slc5a5/slc7a9/slc7a10a/atp11a/slc10a4/tmem30c/slc38a5a/clic2/ttyh2l/slc38a7/pacc1/slc6a6a/slc4a1a/slc4a4a/si:dkey-246g23.4/slc12a3/slc16a9a/slc12a4/slc38a5b/slc10a2/slc23a1/pitpnbl/mfsd5/slc3a1/slc16a12a/slc6a9/clcn5a/slc20a1a/slc7a3a/slc25a55a/slc26a5/clcnk/pitpnc1b/clic4/slc4a2a/slc34a1a/slc26a1/tmem30aa/mfsd2aa/stard14/lrrc8aa/slc19a1/mfsd2ab/slc7a2/zgc:103678/slc35b1/pitpnaa/xkr8.3/sl…	115
GO:0071824	BP	GO:0071824	protein-DNA complex subunit organization	53/4625	134/17035	0.001179648	0.035169959	0.03293195	brf2/brf1b/srcap/rad52/polr1e/supt6h/orc3/smarca1/tbp/psme4b/kat6a/mcm5/mcm3/mis12/mcm6l/smarcb1a/med6/histh1l/tbpl1/mcm3l/taf11/h1-0/nasp/mcm4/rad51/piwil1/dmap1/cenpn/cdc45/cenpp/rnf8/cdt1/rag1/smarca5/gtf2a2/h1-10/chaf1b/mcm6/chaf1a/cenpo/shprh/si:ch211-103n10.5/macroh2a2/cenpx/cenpt/cenpw/oip5/cenph/tbpl2/mcm7/mcm2/h1m/dr1	53
GO:0002262	BP	GO:0002262	myeloid cell homeostasis	47/4625	116/17035	0.001202996	0.035700009	0.033428271	slc40a1/spi1b/pink1/kmt2a/phf8/epc2/pdcd2/jak3/smarca1/slc4a1a/gata1a/klf3/klf1/tal1/nfe2/ncoa4/rps27.1/tspo/epb41b/klf6a/sptb/melk/flvcr1/rac2/alas2/klf17/chrac1/lpar2a/tert/nr4a2b/cicb/kdm6bb/adnp2a/abcc5/abcb10/rasa3/atp5if1a/klf9/smim1/dok2/tet2/gfi1b/lmo2/hemgn/prdm15/tfr1a/jak2a	47
GO:0016180	BP	GO:0016180	snRNA processing	14/4625	24/17035	0.0012702	0.037520642	0.035133049	exosc9/ints6l/ints7/exosc2/exosc6/exosc5/ints14/exosc8/toe1/ints12/exosc3/exosc7/ints4/exosc4	14
GO:0051302	BP	GO:0051302	regulation of cell division	24/4625	50/17035	0.001298455	0.037827235	0.035420132	ect2/rbl1/aurka/mtrex/rab11fip3/plk2b/cdc14b/tgfb1b/aurkb/gdf3/plk3/klhl21/tgfb1a/pkp4/rbl2/plk1/birc6/ikbkb/kdf1a/plk2a/incenp/prc1a/kdf1b/vegfaa	24
GO:0033047	BP	GO:0033047	regulation of mitotic sister chromatid segregation	16/4625	29/17035	0.001311038	0.037827235	0.035420132	mad2l1/anapc5/ppp1r7/znf207a/zw10/mad1l1/aurkb/ttk/cdc23/ndc80/pttg1/anapc1/bub3/bub1/bub1ba/spdl1	16
GO:0007094	BP	GO:0007094	mitotic spindle assembly checkpoint	11/4625	17/17035	0.001321888	0.037827235	0.035420132	mad2l1/znf207a/zw10/mad1l1/aurkb/ttk/ndc80/bub3/bub1/bub1ba/spdl1	11
GO:0031577	BP	GO:0031577	spindle checkpoint	11/4625	17/17035	0.001321888	0.037827235	0.035420132	mad2l1/znf207a/zw10/mad1l1/aurkb/ttk/ndc80/bub3/bub1/bub1ba/spdl1	11
GO:0045841	BP	GO:0045841	negative regulation of mitotic metaphase/anaphase transition	11/4625	17/17035	0.001321888	0.037827235	0.035420132	mad2l1/znf207a/zw10/mad1l1/aurkb/ttk/ndc80/bub3/bub1/bub1ba/spdl1	11
GO:0071173	BP	GO:0071173	spindle assembly checkpoint	11/4625	17/17035	0.001321888	0.037827235	0.035420132	mad2l1/znf207a/zw10/mad1l1/aurkb/ttk/ndc80/bub3/bub1/bub1ba/spdl1	11
GO:0071174	BP	GO:0071174	mitotic spindle checkpoint	11/4625	17/17035	0.001321888	0.037827235	0.035420132	mad2l1/znf207a/zw10/mad1l1/aurkb/ttk/ndc80/bub3/bub1/bub1ba/spdl1	11
GO:0006753	BP	GO:0006753	nucleoside phosphate metabolic process	101/4625	286/17035	0.001378719	0.039278185	0.036778752	ak1/adss2/ada/pank2/aprt/mvk/ppat/acsm3/rnaseh2b/dera/uck2a/agpat9l/ak4/elovl4a/nadk2/nudt17/kmo/pank1b/prtfdc1/umps/pfkpb/rrm1/gucy2c/adcy2b/hprt1l/gpat3/gmpr/atic/adsl/npr1b/cds1/aldocb/cmpk/hddc3/uck2b/eno1a/tpi1a/elovl4b/naprt/pfkpa/impdh1b/guk1a/nampta/ctps1a/ak8/nos2b/ampd3b/paics/ido1/nt5c1bb/dctd/aspdh/elovl6l/hkdc1/hk1/gapdhs/upp1/cad/pklr/tyms/suclg2/mcee/dtymk/aldob/dctpp1/pipox/atp5mc…	101
GO:0055086	BP	GO:0055086	nucleobase-containing small molecule metabolic process	120/4625	348/17035	0.001426797	0.040346495	0.037779081	ak1/adss2/ada/pank2/aprt/mvk/ppat/acsm3/rnaseh2b/ugp2a/dera/uck2a/agpat9l/ak4/elovl4a/gnmt/nadk2/nudt17/ugp2b/kmo/pank1b/prtfdc1/umps/pfkpb/uap1l1/rrm1/gucy2c/adcy2b/hprt1l/ada2b/gpat3/gmpr/atic/adsl/gmppb/npr1b/cds1/aldocb/cmpk/aox6/hddc3/uck2b/eno1a/pgm3/tpi1a/elovl4b/naprt/pfkpa/impdh1b/guk1a/nampta/ctps1a/ak8/nos2b/ampd3b/paics/ido1/nt5c1bb/dctd/ttr/pmm2/zgc:103559/aspdh/elovl6l/hkdc1/hk1/gap…	120
GO:0000183	BP	GO:0000183	rDNA heterochromatin assembly	5/4625	5/17035	0.001472867	0.040346495	0.037779081	phf8/phf2/naa40/rrp8/bend3	5
GO:0008207	BP	GO:0008207	C21-steroid hormone metabolic process	5/4625	5/17035	0.001472867	0.040346495	0.037779081	cyp11a1/cyp17a1/cyp11c1/cyp17a2/cyp11a2	5
GO:0032793	BP	GO:0032793	positive regulation of CREB transcription factor activity	5/4625	5/17035	0.001472867	0.040346495	0.037779081	lpar5a/crtc3/crtc2/crtc1a/crtc1b	5
GO:0034501	BP	GO:0034501	protein localization to kinetochore	5/4625	5/17035	0.001472867	0.040346495	0.037779081	mis12/aurkb/ttk/knl1/spdl1	5
GO:0071459	BP	GO:0071459	protein localization to chromosome, centromeric region	5/4625	5/17035	0.001472867	0.040346495	0.037779081	mis12/aurkb/ttk/knl1/spdl1	5
GO:1902292	BP	GO:1902292	cell cycle DNA replication initiation	5/4625	5/17035	0.001472867	0.040346495	0.037779081	mcm3/mcm3l/mcm4/pola1/mcm2	5
GO:1902315	BP	GO:1902315	nuclear cell cycle DNA replication initiation	5/4625	5/17035	0.001472867	0.040346495	0.037779081	mcm3/mcm3l/mcm4/pola1/mcm2	5
GO:1902975	BP	GO:1902975	mitotic DNA replication initiation	5/4625	5/17035	0.001472867	0.040346495	0.037779081	mcm3/mcm3l/mcm4/pola1/mcm2	5
GO:0009156	BP	GO:0009156	ribonucleoside monophosphate biosynthetic process	19/4625	37/17035	0.001498696	0.040879332	0.038278011	adss2/ada/aprt/ppat/uck2a/prtfdc1/umps/hprt1l/atic/adsl/uck2b/impdh1b/ampd3b/paics/upp1/gmps/adss1/gart/ampd2a	19
GO:0051028	BP	GO:0051028	mRNA transport	22/4625	45/17035	0.001510489	0.041026412	0.038415732	ddx19/rae1/igf2bp3/nup35/ncbp2/thoc7/ndc1/nup42/thoc6/thoc5/magoh/ncbp3/lrmp/thoc3/igf2bp1/nxt2/alkbh5/slbp2/eny2/thoc1/qkia/slbp	22
GO:0046033	BP	GO:0046033	AMP metabolic process	10/4625	15/17035	0.001591313	0.043039304	0.040300535	ak1/adss2/aprt/ak4/adsl/ampd3b/ak3/nt5e/adss1/ampd2a	10
GO:0000387	BP	GO:0000387	spliceosomal snRNP assembly	13/4625	22/17035	0.001611624	0.043223885	0.040473371	snrpc/snrpd1/snrpd3/lsm4/coil/snrpd2/prmt7/gemin8/ddx20/snrpd3l/prpf31/snrpg/clns1a	13
GO:0045839	BP	GO:0045839	negative regulation of mitotic nuclear division	13/4625	22/17035	0.001611624	0.043223885	0.040473371	mad2l1/znf207a/zw10/mad1l1/aurkb/fbxo5/ttk/ndc80/pttg1/bub3/bub1/bub1ba/spdl1	13
GO:0009165	BP	GO:0009165	nucleotide biosynthetic process	67/4625	179/17035	0.001639099	0.043777603	0.040991853	ak1/adss2/pank2/aprt/ppat/uck2a/agpat9l/ak4/elovl4a/nadk2/kmo/pank1b/prtfdc1/umps/rrm1/gucy2c/adcy2b/hprt1l/gpat3/atic/adsl/npr1b/cds1/cmpk/uck2b/elovl4b/naprt/impdh1b/nampta/ctps1a/nos2b/ampd3b/paics/ido1/dctd/aspdh/elovl6l/upp1/cad/tyms/dtymk/atp5mc1/papss2b/ak3/dcakd/ATP8/ATP6/nppc/cox5b2/nos1/elovl7a/haao/rrm2/gmps/nme4/nme8/nme2b.2/adss1/kynu/elovl1a/tamm41/elovl7b/adcy9/gart/elovl1b/ampd2a/…	67
GO:0006487	BP	GO:0006487	protein N-linked glycosylation	23/4625	48/17035	0.001674413	0.044535215	0.041701256	fut8a/alg6/syvn1/alg11/mgat1b/mgat3b/dolpp1/ddost/pmm2/zgc:101663/srd5a3/alg3/alg13/rpn1/dpagt1/alg5/uggt2/mgat4a/mgat5/tmem258/si:ch73-195i19.3/zgc:154054/alg14	23
GO:0051225	BP	GO:0051225	spindle assembly	24/4625	51/17035	0.001828061	0.048420943	0.045339718	kifc1/spice1/nek2/kif11/tubgcp2/kif23/znf207a/haus4/haus5/stil/tubgcp3/si:dkey-170l10.1/haus7/aurkb/birc5b/haus1/haus3/si:zfos-452g4.1/birc5a/si:ch211-153a8.4/cenpw/abraxas2/mapre2/haus6	24
GO:0033044	BP	GO:0033044	regulation of chromosome organization	44/4625	109/17035	0.001847551	0.048735818	0.045634557	noc2l/mad2l1/mtf2/supt6h/phf8/anapc5/ppp1r7/znf207a/phf2/zw10/jdp2b/naa40/mad1l1/histh1l/znf703/zgc:91944/aurkb/h1-0/setdb1a/ttk/cdc45/wapla/cdca5/cdc23/h1-10/dnmt3bb.2/terf1/atad2b/prmt6/mos/ndc80/pttg1/anapc1/bub3/bub1/si:ch211-103n10.5/acd/zgc:162255/bub1ba/ehmt2/mcm2/h1m/rmi2/spdl1	44
GO:0000291	BP	GO:0000291	nuclear-transcribed mRNA catabolic process, exonucleolytic	9/4625	13/17035	0.001873388	0.048814702	0.045708421	exosc9/cnot8/exosc2/exosc6/exosc5/exosc8/exosc3/exosc7/exosc4	9
GO:0007080	BP	GO:0007080	mitotic metaphase plate congression	9/4625	13/17035	0.001873388	0.048814702	0.045708421	mad1l1/nuf2/cdca5/cdt1/ccnb1/birc5b/cenpe/ndc80/spdl1	9
GO:0044818	BP	GO:0044818	mitotic G2/M transition checkpoint	9/4625	13/17035	0.001873388	0.048814702	0.045708421	cdc6/dtl/orc1/nbn/ticrr/topbp1/mrnip/zgc:162895/chek1	9
GO:0005730	CC	GO:0005730	nucleolus	130/4725	223/17318	1.42E-22	1.33E-19	1.22E-19	bysl/noc2l/dcaf13/nusap1/noc3l/utp15/wdr12/mak16/rrs1/parp3/pin4/zgc:173742/wdr36/rpf1/exosc9/polr1e/phf8/mrto4/ddx55/ddx11/wdr3/fen1/mphosph10/npm1a/ilf2/nmd3/dkc1/lin28a/fbxw11b/utp4/utp25/sf3b4/phf2/pes/nol10/eif6/gnl3l/ddx56/c1d/cdc14b/snu13b/pinx1/twistnb/aatf/ddx51/nol11/rpp30/ddx18/rrp36/prkrip1/mdm2/surf6/cdkn2aip/exosc6/znrd1/pwp2h/exosc10/polr3k/nol12/polr2h/utp11/rsl24d1/polr2i/exosc5/…	130
GO:0030684	CC	GO:0030684	preribosome	51/4725	73/17318	4.07E-14	1.91E-11	1.75E-11	bysl/noc2l/dcaf13/wdr12/mak16/rrs1/wdr36/rpf1/mrto4/nsa2/tsr1/ltv1/wdr3/mphosph10/rrp15/riok1/fbxw11b/utp4/utp25/pes/nol10/eif6/ppan/snu13b/rrp36/riok2/pwp2h/utp11/rrp9/znf593/noc4l/tbl3/imp4/ebna1bp2/utp3/nip7/nol6/wdr74/las1l/bop1/fam207a/wdr37/wdr46/utp6/rrp7a/heatr1/fcf1/rrp1/nop58/ftsj3/utp23	51
GO:0098687	CC	GO:0098687	chromosomal region	64/4725	113/17318	4.48E-11	1.40E-08	1.29E-08	ercc6l/nabp1a/mad2l1/ncapd2/rad21a/stn1/ndel1a/aurka/znf207a/phf2/zw10/spout1/dscc1/nsl1/pane1/mis12/suv39h1a/mad1l1/nuf2/ncapd3/zgc:91944/rpa2/aurkb/cenpl/orc1/ska1/nbn/ttk/mis18bp1/tert/cdca8/nabp1b/cenpp/rnf8/dclre1c/cdt1/tinf2/zwilch/terf1/ska3/xrcc6/ndc80/cenpo/bub3/bub1/si:dkey-6i22.5/acd/dna2/bub1ba/mbd6/cdca9/cenpt/dclre1a/cenpw/si:dkey-57a22.11/oip5/spc24/cenph/si:dkey-14d8.1/si:dkey-249…	64
GO:0030687	CC	GO:0030687	preribosome, large subunit precursor	20/4725	22/17318	6.44E-10	1.43E-07	1.31E-07	noc2l/wdr12/mak16/rrs1/rpf1/mrto4/nsa2/rrp15/pes/eif6/ppan/znf593/ebna1bp2/nip7/wdr74/las1l/bop1/wdr37/rrp1/ftsj3	20
GO:0000228	CC	GO:0000228	nuclear chromosome	118/4725	264/17318	7.61E-10	1.43E-07	1.31E-07	ncor2/gins2/ruvbl1/rpa3/zgc:173742/nabp1a/ncapd2/srcap/hmgb3b/eomesa/gins1/stn1/orc3/smarca2/mef2cb/sirt2/smarcb1b/aurka/smarca1/pole4/polr3glb/pola2/wdhd1/gins4/ssrp1b/kat6a/smarcd3b/sfr1/polr3g/brd8/mis12/pold1/mef2ca/mef2aa/smarcb1a/nuf2/ncapd3/ncor1/zgc:91944/tipin/rpa2/ssrp1a/aurkb/thoc5/orc1/mef2d/nbn/rad1/rad51/dmap1/chrac1/mis18bp1/yy1a/jun/nabp1b/cdc45/mei4/pola1/dclre1c/mcm10/brms1/smar…	118
GO:0000775	CC	GO:0000775	chromosome, centromeric region	44/4725	75/17318	1.09E-08	1.71E-06	1.57E-06	ercc6l/mad2l1/ncapd2/rad21a/ndel1a/aurka/znf207a/phf2/zw10/spout1/dscc1/nsl1/pane1/mis12/suv39h1a/mad1l1/nuf2/ncapd3/aurkb/cenpl/ska1/ttk/mis18bp1/cdca8/cenpp/cdt1/zwilch/ska3/ndc80/cenpo/bub3/bub1/si:dkey-6i22.5/bub1ba/cdca9/cenpt/cenpw/si:dkey-57a22.11/oip5/spc24/cenph/sgo1/bod1/spdl1	44
GO:0043186	CC	GO:0043186	P granule	18/4725	21/17318	3.73E-08	5.01E-06	4.60E-06	asz1/tdrd1/tdrd9/ddx4/henmt1/dnd1/helz/tdrd7a/piwil1/mov10b.2/mov10b.1/piwil2/nanos3/dynll2a/tdrd5/gra/exd1/snrpg	18
GO:0060293	CC	GO:0060293	germ plasm	18/4725	22/17318	1.52E-07	1.79E-05	1.64E-05	asz1/tdrd1/tdrd9/ddx4/henmt1/dnd1/helz/tdrd7a/piwil1/mov10b.2/mov10b.1/piwil2/nanos3/dynll2a/tdrd5/gra/exd1/snrpg	18
GO:0043596	CC	GO:0043596	nuclear replication fork	21/4725	28/17318	2.00E-07	2.09E-05	1.92E-05	gins2/rpa3/zgc:173742/pola2/wdhd1/gins4/pold1/tipin/rpa2/cdc45/pola1/mcm10/prim2/tonsl/mms22l/etaa1/pold3/si:dkey-28b4.7/top1/zranb3/pold2	21
GO:1990904	CC	GO:1990904	ribonucleoprotein complex	179/4725	475/17318	3.63E-07	3.41E-05	3.13E-05	bysl/noc2l/dcaf13/pabpc1l/wdr12/mak16/mrpl21/rrs1/larp6b/wdr36/larp6a/rpf1/eif2s1a/mrto4/nsa2/tsr1/cpeb1b/ltv1/snrpc/rpl22l1/si:dkey-156n14.5/wdr3/snrpb/snrpd1/mrpl19/ctnnbl1/mphosph10/eif2d/rrp15/snrpd3/cwc22/srp72/prpf19/u2af1/fxr2/riok1/dkc1/sf3b5/lin28a/fbxw11b/larp7/utp4/utp25/g3bp1/sf3b2/smn1/sf3b4/snrpa/pes/nol10/rpl5a/eif6/srp68/pabpc1b/nsun4/ppan/fxr1/ccdc12/rps27.1/snu13b/lsm4/znhit3/mr…	179
GO:0045495	CC	GO:0045495	pole plasm	18/4725	23/17318	5.21E-07	4.45E-05	4.09E-05	asz1/tdrd1/tdrd9/ddx4/henmt1/dnd1/helz/tdrd7a/piwil1/mov10b.2/mov10b.1/piwil2/nanos3/dynll2a/tdrd5/gra/exd1/snrpg	18
GO:0000793	CC	GO:0000793	condensed chromosome	40/4725	73/17318	6.27E-07	4.90E-05	4.50E-05	ercc6l/ncapd2/rad21a/tmpoa/stag2a/aurka/phf2/cdc14b/nsmce4a/nsl1/mis12/ncaph2/nuf2/ncapd3/aurkb/ska1/rad1/rad51/mis18bp1/mei4/cdca5/fancd2/rad9a/zwilch/stag1a/ncaph/ska3/ncapg/ndc80/cenpo/rad9b/bub1/si:dkey-6i22.5/bub1ba/brd4/spc24/zgc:162895/syce2/bod1/spdl1	40
GO:0005657	CC	GO:0005657	replication fork	26/4725	41/17318	1.40E-06	9.68E-05	8.89E-05	gins2/rpa3/zgc:173742/xrcc2/pola2/wdhd1/gins4/pif1/pold1/rfc5/tipin/rpa2/cdc45/pola1/mcm10/prim2/rpl9/rfc3/tonsl/mms22l/etaa1/pold3/si:dkey-28b4.7/top1/zranb3/pold2	26
GO:0030686	CC	GO:0030686	90S preribosome	20/4725	28/17318	1.44E-06	9.68E-05	8.89E-05	noc2l/wdr12/wdr36/wdr3/mphosph10/fbxw11b/utp4/pes/rrp36/pwp2h/noc4l/tbl3/imp4/nol6/bop1/fam207a/wdr37/utp6/rrp7a/heatr1	20
GO:0005819	CC	GO:0005819	spindle	51/4725	108/17318	7.27E-06	0.000455217	0.000417939	kifc1/nusap1/unc119.2/pin4/spice1/rad21a/specc1la/rae1/rtraf/kif11/ndel1a/ddx11/sirt2/aurka/tubgcp2/dvl3a/plk2b/spout1/cdc14b/katna1/wdr73/tubgcp3/mad1l1/aurkb/plk3/fbxo5/klhl21/ska1/ttk/bora/eml1/cdca8/unc119b/lrmp/birc5b/eml3/plk1/ska3/jtb/si:zfos-452g4.1/espl1/birc5a/tpx2/mms19/cdk1/cdca9/plk2a/mapre2/haus6/bod1/spdl1	51
GO:0032040	CC	GO:0032040	small-subunit processome	23/4725	37/17318	9.29E-06	0.000545445	0.000500778	dcaf13/wdr36/wdr3/mphosph10/fbxw11b/utp4/utp25/nol10/snu13b/pwp2h/utp11/rrp9/noc4l/tbl3/imp4/utp3/nol6/wdr46/utp6/heatr1/fcf1/nop58/utp23	23
GO:0000794	CC	GO:0000794	condensed nuclear chromosome	20/4725	31/17318	1.61E-05	0.00089089	0.000817935	ncapd2/aurka/mis12/nuf2/ncapd3/aurkb/rad1/rad51/mis18bp1/mei4/rad9a/ncaph/ndc80/cenpo/rad9b/bub1/si:dkey-6i22.5/bub1ba/zgc:162895/syce2	20
GO:0000176	CC	GO:0000176	nuclear exosome (RNase complex)	11/4725	13/17318	2.72E-05	0.001343064	0.00123308	exosc9/exosc2/exosc6/exosc10/exosc5/exosc1/exosc8/mphosph6/exosc3/exosc7/exosc4	11
GO:0042555	CC	GO:0042555	MCM complex	11/4725	13/17318	2.72E-05	0.001343064	0.00123308	mcm5/mcm3/mcm6l/mcm3l/mcm4/mcmbp/mcm6/tonsl/mms22l/mcm7/mcm2	11
GO:0000178	CC	GO:0000178	exosome (RNase complex)	12/4725	15/17318	3.22E-05	0.001440556	0.001322588	exosc9/exosc2/exosc6/exosc10/exosc5/exosc1/exosc8/supv3l1/mphosph6/exosc3/exosc7/exosc4	12
GO:1905354	CC	GO:1905354	exoribonuclease complex	12/4725	15/17318	3.22E-05	0.001440556	0.001322588	exosc9/exosc2/exosc6/exosc10/exosc5/exosc1/exosc8/supv3l1/mphosph6/exosc3/exosc7/exosc4	12
GO:0000779	CC	GO:0000779	condensed chromosome, centromeric region	21/4725	35/17318	4.88E-05	0.002083345	0.00191274	ercc6l/ncapd2/aurka/phf2/nsl1/mis12/nuf2/ncapd3/aurkb/ska1/mis18bp1/zwilch/ska3/ndc80/cenpo/bub1/si:dkey-6i22.5/bub1ba/spc24/bod1/spdl1	21
GO:0070652	CC	GO:0070652	HAUS complex	7/4725	7/17318	0.000112182	0.004579962	0.004204909	haus4/haus5/si:dkey-170l10.1/haus7/haus1/haus3/haus6	7
GO:0000776	CC	GO:0000776	kinetochore	29/4725	57/17318	0.000129576	0.005069677	0.004654521	ercc6l/mad2l1/ndel1a/znf207a/phf2/zw10/spout1/nsl1/mis12/mad1l1/nuf2/ska1/ttk/mis18bp1/cdt1/zwilch/ska3/ndc80/cenpo/bub3/bub1/si:dkey-6i22.5/bub1ba/cenpt/cenpw/spc24/cenph/bod1/spdl1	29
GO:0035770	CC	GO:0035770	ribonucleoprotein granule	40/4725	87/17318	0.000141327	0.005308253	0.00487356	pabpc1l/eif4a1b/asz1/ddx19/tdrd1/atxn2l/tdrd9/ddx4/fxr2/lin28a/smn1/henmt1/cnot8/pabpc1b/dnd1/fxr1/lsm4/helz/tdrd7a/piwil1/lsm1/sumo1/dcp1b/pnrc2/mov10b.2/rock1/pabpc4/mov10b.1/piwil2/nanos3/dynll2a/tdrd5/tnrc6b/tnrc6c1/gra/si:dkey-46g23.1/patl2/exd1/snrpg/smx5	40
GO:0036464	CC	GO:0036464	cytoplasmic ribonucleoprotein granule	39/4725	85/17318	0.000179684	0.006489347	0.005957934	pabpc1l/eif4a1b/asz1/ddx19/tdrd1/atxn2l/tdrd9/ddx4/fxr2/lin28a/smn1/henmt1/cnot8/pabpc1b/dnd1/fxr1/lsm4/helz/tdrd7a/piwil1/lsm1/dcp1b/pnrc2/mov10b.2/rock1/pabpc4/mov10b.1/piwil2/nanos3/dynll2a/tdrd5/tnrc6b/tnrc6c1/gra/si:dkey-46g23.1/patl2/exd1/snrpg/smx5	39
GO:0000177	CC	GO:0000177	cytoplasmic exosome (RNase complex)	9/4725	11/17318	0.000261334	0.008764011	0.008046326	exosc9/exosc2/exosc6/exosc5/exosc8/supv3l1/exosc3/exosc7/exosc4	9
GO:0030688	CC	GO:0030688	preribosome, small subunit precursor	9/4725	11/17318	0.000261334	0.008764011	0.008046326	bysl/tsr1/ltv1/riok1/riok2/noc4l/fam207a/rrp1/ftsj3	9
GO:0000780	CC	GO:0000780	condensed nuclear chromosome, centromeric region	10/4725	13/17318	0.000277219	0.008976171	0.008241112	aurka/mis12/nuf2/aurkb/mis18bp1/ndc80/cenpo/bub1/si:dkey-6i22.5/bub1ba	10
GO:0120114	CC	GO:0120114	Sm-like protein family complex	28/4725	57/17318	0.000359157	0.011241607	0.010321032	snrpc/snrpb/snrpd1/snrpd3/sf3b5/sf3b2/snrpa/snu13b/lsm4/snrpa1/cd2bp2/txnl4a/snrpb2/snrpd2/gemin7/sf3a1/lsm1/gemin8/sf3b1/ddx20/prpf4/lsm5/snrpd3l/lsm11/prpf31/snrpg/clns1a/smx5	28
GO:0005635	CC	GO:0005635	nuclear envelope	55/4725	135/17318	0.000472287	0.014305712	0.013134217	nup155/maco1a/cse1l/rae1/syne1a/tor4aa/sigmar1/nup35/lbr/nutf2l/kpna1/ctdnep1a/ipo9/nup50/parp16/dnajb6b/ndc1/bnip3lb/nup42/nup188/tmem120a/zgc:101699/mad1l1/nup58/cnep1r1/chmp7/kpna5/tmem120b/atraid/nup43/p2rx4a/noc4l/lrmp/zgc:162025/alox5ap/tor1l1/sephs1/nxt2/ltc4s/syne1b/nrm/si:ch211-137a8.2/eny2/mgst2/lrrc59/nemp1/nup98/si:ch1073-429i10.1/zgc:152977/si:dkey-92f12.2/bmb/bnip3/nsmfb/lmnb2/rogdi	55
GO:0005686	CC	GO:0005686	U2 snRNP	11/4725	16/17318	0.000647466	0.018423344	0.016914656	snrpb/snrpd1/snrpd3/sf3b5/sf3b2/snrpa1/snrpd2/sf3a1/sf3b1/snrpd3l/snrpg	11
GO:0042575	CC	GO:0042575	DNA polymerase complex	11/4725	16/17318	0.000647466	0.018423344	0.016914656	pole4/pola2/pold1/tert/pola1/prim2/pole/pold3/si:dkey-28b4.7/pold2/pole2	11
GO:0030894	CC	GO:0030894	replisome	10/4725	14/17318	0.000732008	0.019638725	0.018030509	rpa3/pola2/pold1/rpa2/pola1/prim2/tonsl/pold3/si:dkey-28b4.7/pold2	10
GO:0043601	CC	GO:0043601	nuclear replisome	10/4725	14/17318	0.000732008	0.019638725	0.018030509	rpa3/pola2/pold1/rpa2/pola1/prim2/tonsl/pold3/si:dkey-28b4.7/pold2	10
GO:0031298	CC	GO:0031298	replication fork protection complex	8/4725	10/17318	0.000791047	0.020633134	0.018943486	gins2/zgc:173742/wdhd1/gins4/tipin/cdc45/mcm10/top1	8
GO:0008305	CC	GO:0008305	integrin complex	18/4725	33/17318	0.000844781	0.020874989	0.019165536	itgav/itga5/itgb5/itgb2/itga2b/itgb4/itgbl1/itga6a/itgb7/itgb3b/itgb1b.1/itgae.2/itga6b/itgb1a/itga1/zmp:0000001082/itga4/itgb1b	18
GO:0098636	CC	GO:0098636	protein complex involved in cell adhesion	18/4725	33/17318	0.000844781	0.020874989	0.019165536	itgav/itga5/itgb5/itgb2/itga2b/itgb4/itgbl1/itga6a/itgb7/itgb3b/itgb1b.1/itgae.2/itga6b/itgb1a/itga1/zmp:0000001082/itga4/itgb1b	18
GO:0000922	CC	GO:0000922	spindle pole	21/4725	41/17318	0.000961138	0.023141238	0.021246201	unc119.2/rad21a/rae1/ddx11/aurka/tubgcp2/plk2b/spout1/cdc14b/katna1/wdr73/tubgcp3/aurkb/plk3/klhl21/unc119b/lrmp/plk1/plk2a/bod1/spdl1	21
GO:0000777	CC	GO:0000777	condensed chromosome kinetochore	17/4725	31/17318	0.001082945	0.025422123	0.023340305	ercc6l/phf2/nsl1/mis12/nuf2/ska1/mis18bp1/zwilch/ska3/ndc80/cenpo/bub1/si:dkey-6i22.5/bub1ba/spc24/bod1/spdl1	17
GO:0019012	CC	GO:0019012	virion	18/4725	34/17318	0.001340496	0.029969657	0.027515441	hnrpkl/snrpb/snrpd1/snrpd3/snrpa/hnrnpk/snrnp40/utp11/snrpd2/raver1/hnrnpc/imp4/hnrnpa3/snrpd3l/zp2.1/elavl1b/zgc:55733/zp2.2	18
GO:0044423	CC	GO:0044423	virion part	18/4725	34/17318	0.001340496	0.029969657	0.027515441	hnrpkl/snrpb/snrpd1/snrpd3/snrpa/hnrnpk/snrnp40/utp11/snrpd2/raver1/hnrnpc/imp4/hnrnpa3/snrpd3l/zp2.1/elavl1b/zgc:55733/zp2.2	18
GO:0000796	CC	GO:0000796	condensin complex	5/4725	5/17318	0.001509565	0.032215485	0.029577358	ncapd2/ncaph2/ncapd3/ncaph/ncapg	5
GO:0031261	CC	GO:0031261	DNA replication preinitiation complex	5/4725	5/17318	0.001509565	0.032215485	0.029577358	gins2/gins1/orc3/gins4/cdc45	5
GO:0000781	CC	GO:0000781	chromosome, telomeric region	19/4725	37/17318	0.001597214	0.033328541	0.030599266	nabp1a/stn1/zgc:91944/rpa2/orc1/nbn/tert/nabp1b/rnf8/dclre1c/tinf2/terf1/xrcc6/acd/dna2/dclre1a/si:dkey-14d8.1/si:dkey-249d8.1/xrcc5	19
GO:0000778	CC	GO:0000778	condensed nuclear chromosome kinetochore	8/4725	11/17318	0.002203615	0.042307673	0.038843096	mis12/nuf2/mis18bp1/ndc80/cenpo/bub1/si:dkey-6i22.5/bub1ba	8
GO:0005687	CC	GO:0005687	U4 snRNP	6/4725	7/17318	0.002207749	0.042307673	0.038843096	snrpb/snrpd1/snrpd3/snrpd3l/prpf31/snrpg	6
GO:0034388	CC	GO:0034388	Pwp2p-containing subcomplex of 90S preribosome	6/4725	7/17318	0.002207749	0.042307673	0.038843096	wdr36/wdr3/fbxw11b/pwp2h/tbl3/utp6	6
GO:0043256	CC	GO:0043256	laminin complex	6/4725	7/17318	0.002207749	0.042307673	0.038843096	lamb2/lamb2l/lamb1b/lama5/lamb1a/ntn4	6
GO:0061695	CC	GO:0061695	transferase complex, transferring phosphorus-containing groups	73/4725	199/17318	0.002253704	0.04232457	0.03885861	mnat1/polr1e/gtf2f2b/ccnh/cks1b/ccna2/polr3f/pfkpb/pole4/polr3glb/tbp/pola2/ccng2/pik3cg/pik3r2/acvrl1/twistnb/polr3g/taf5l/cdk2/ccnd3/pold1/pfkpa/pik3r3b/znrd1/ccnb2/tbpl1/pfkfb1/polr3k/taf11/rpap2/polr2h/pik3r1/polr2i/tert/ccna1/prkab1a/pola1/socs2/cdk7/ccnb1/prim2/gtf2a2/cntd2/leo1/polr3c/pole/sik1/prkaa1/pik3c2a/sik2b/gtf2a1l/ccni/polr2m/pik3cb/polr2k/pold3/socs7/ccnjl/polr1b/ikbkb/si:dkey-28…	73
GO:0016741	MF	GO:0016741	transferase activity, transferring one-carbon groups	104/4733	203/17439	2.22E-13	4.83E-10	4.59E-10	lcmt2/trmt2a/kmt2a/mtfmt/gnmt/ftcd/mettl2a/trmt61a/mettl13/trmt1/mettl21a/hnmt/pcmt/mrm3a/atic/mettl8/henmt1/prmt3/icmt/nsun4/asmtl/ntmt1/comtb/nsd2/suv39h1a/si:ch211-173n18.3/dnmt1/trmt44/trmt2b/trdmt1/si:ch1073-157b13.1/setd4/trmt10a/prmt9/dnmt3bb.1/trmo/ezh1/tyw3/trmt11/tfb1m/setdb1a/trmt10c/cad/dmap1/trmt6/tyms/nsun5/mgmt/nop2/prmt7/shmt1/zgc:113054/mettl16/nsun2/dnmt3bb.2/dnmt3bb.3/mrm1/nsd1…	104
GO:0140098	MF	GO:0140098	catalytic activity, acting on RNA	139/4733	304/17439	2.07E-12	2.26E-09	2.15E-09	lcmt2/rtca/trmt2a/eif4a1b/rnaseh2b/mtfmt/ddx19/ddx39aa/polr1e/mettl2a/sars1/trmt61a/smfn/ddx55/si:dkey-156n14.5/trmt1/fen1/wars2/polr3f/si:dkey-97a13.6/ddx49/tdrd9/mtrex/polr3glb/ddx4/ddx39ab/ptrhd1/mrm3a/mettl8/henmt1/rnaseh2a/lars1b/cnot8/ddx56/ddx43/twistnb/polr3g/ddx51/rpp30/ddx18/pde12/rars2/qrsl1/trmt44/trmt2b/ddx31/si:ch1073-157b13.1/yars1/ddx39b/znrd1/rnasel3/rnaset2/trmo/exosc10/polr3k/t…	139
GO:0008168	MF	GO:0008168	methyltransferase activity	96/4733	194/17439	2.43E-11	1.77E-08	1.68E-08	lcmt2/trmt2a/kmt2a/gnmt/mettl2a/trmt61a/mettl13/trmt1/mettl21a/hnmt/pcmt/mrm3a/mettl8/henmt1/prmt3/icmt/nsun4/asmtl/ntmt1/comtb/nsd2/suv39h1a/si:ch211-173n18.3/dnmt1/trmt44/trmt2b/trdmt1/si:ch1073-157b13.1/setd4/trmt10a/prmt9/dnmt3bb.1/trmo/ezh1/tyw3/trmt11/tfb1m/setdb1a/trmt10c/dmap1/trmt6/tyms/nsun5/mgmt/nop2/prmt7/shmt1/zgc:113054/mettl16/nsun2/dnmt3bb.2/dnmt3bb.3/mrm1/nsd1a/alkbh8/kmt2bb/setd…	96
GO:0016887	MF	GO:0016887	ATPase activity	152/4733	355/17439	9.68E-11	5.28E-08	5.01E-08	pms1/dnah6/kifc1/gins2/ercc6l/ruvbl1/eif4a1b/dynll2b/wrnip1/srcap/kif4/ddx19/ddx39aa/gtf2f2b/gins1/fign/smarca2/mdn1/ddx55/tor4aa/zgc:56231/si:dkey-156n14.5/abcb4/kif11/ddx11/afg1la/abcb11a/hsc70/ercc6l2/si:dkey-97a13.6/smarca1/ddx49/tdrd9/mtrex/abca2/xrcc2/abcc2/ddx4/kif23/ddx39ab/abcc9/gins4/msh2/rad54l/mcm5/dscc1/pif1/ddx56/abcb5/katna1/ercc2/ddx43/atad1a/mcm3/top2a/ddx51/rad18/rbbp4/atp13a1/v…	152
GO:0140097	MF	GO:0140097	catalytic activity, acting on DNA	84/4733	169/17439	3.18E-10	1.20E-07	1.14E-07	gins2/ercc6l/ruvbl1/polb/zgc:173742/wrnip1/dnase1l1/gtf2f2b/gins1/apex2/ddx11/dnase1l4.2/fen1/si:dkey-97a13.6/spo11/ercc4/pola2/dnase1l4.1/gins4/mgme1/neil1/rad54l/mcm5/neil3/pif1/ercc2/dnase1l1l/mcm3/top2a/pold1/rad18/dnmt1/mcm6l/top2b/tdp2b/dnmt3bb.1/mcm3l/poll/mcm4/nbn/rad51/unga/tert/exo5/cdc45/pola1/dclre1c/apex1/rag1/ruvbl2/exo1/mcm6/pole/terf1/recql5/lig1/fan1/mus81/mpg/tatdn2/tdp1/brip1/p…	84
GO:0004386	MF	GO:0004386	helicase activity	63/4733	115/17439	3.31E-10	1.20E-07	1.14E-07	gins2/ercc6l/ruvbl1/eif4a1b/wrnip1/ddx19/ddx39aa/gtf2f2b/gins1/ddx55/si:dkey-156n14.5/ddx11/si:dkey-97a13.6/ddx49/tdrd9/mtrex/ddx4/ddx39ab/gins4/mcm5/pif1/ddx56/ercc2/ddx43/mcm3/ddx51/rad18/helz/ddx18/mcm6l/ddx31/ddx39b/mcm3l/mcm4/nbn/dhx29/cdc45/ruvbl2/mov10b.2/mcm6/hells/recql5/ddx28/mov10b.1/ddx20/dhx37/brip1/tdrd12/blm/dhx32a/supv3l1/dhx58/zranb3/ddx27/actr5/xrcc5/dhx38/ddx52/mcm7/ddx47/mcm2/…	63
GO:0008094	MF	GO:0008094	DNA-dependent ATPase activity	49/4733	85/17439	3.04E-09	9.47E-07	8.99E-07	gins2/ercc6l/ruvbl1/wrnip1/gtf2f2b/gins1/smarca2/ddx11/ercc6l2/si:dkey-97a13.6/smarca1/xrcc2/gins4/msh2/rad54l/mcm5/dscc1/pif1/ercc2/mcm3/top2a/rad18/rbbp4/mcm6l/top2b/rfc5/mcm3l/mcm4/nbn/rad51/cdc45/smarca5/rpl9/ruvbl2/rfc3/mcm6/hells/recql5/msh3/brip1/ercc6/blm/supv3l1/zranb3/actr5/mcm7/mcm2/actr8/msh6	49
GO:0004518	MF	GO:0004518	nuclease activity	73/4733	150/17439	1.42E-08	3.87E-06	3.68E-06	rnaseh2b/dnase1l1/apex2/smfn/dnase1l4.2/fen1/si:dkey-97a13.6/spo11/ercc4/dnase1l4.1/exd2/mgme1/neil1/rnaseh2a/cnot8/neil3/dnase1l1l/rpp30/pold1/pde12/tdp2b/rnasel3/rnaset2/zgc:152968/exosc10/rad1/piwil1/tsn/rnaseh1/exo5/rpp21/eri1/elac1/dclre1c/apex1/rag1/cnot6l/pelo/drosha/exo1/dbr1/rad9a/rnaset2l/pole/pld6/fan1/piwil2/tsen15/mus81/tatdn2/prorp/rad9b/eme1/si:ch211-165i18.2/toe1/angel1/noctb/dna2…	73
GO:0008175	MF	GO:0008175	tRNA methyltransferase activity	22/4733	28/17439	2.10E-08	5.08E-06	4.82E-06	lcmt2/mettl2a/trmt61a/trmt1/mettl8/trmt44/trmt2b/trmo/tyw3/trmt11/trmt10c/trmt6/nsun2/alkbh8/trmt5/mettl1/si:dkey-85a20.4/wdr4/thumpd2/trmt61b/trmt9b/trmt13	22
GO:0008173	MF	GO:0008173	RNA methyltransferase activity	35/4733	56/17439	3.15E-08	6.86E-06	6.51E-06	lcmt2/trmt2a/mettl2a/trmt61a/trmt1/mrm3a/mettl8/henmt1/trmt44/trmt2b/si:ch1073-157b13.1/trmo/tyw3/trmt11/tfb1m/trmt10c/trmt6/nop2/mettl16/nsun2/mrm1/alkbh8/bud23/mrm3b/trmt5/mettl14/mettl1/si:dkey-85a20.4/wdr4/thumpd2/trmt61b/trmt9b/trmt13/ftsj3/tgs1	35
GO:0015294	MF	GO:0015294	solute:cation symporter activity	55/4733	111/17439	3.96E-07	7.84E-05	7.44E-05	slc6a22.2/si:ch211-225b11.1/slc45a2/slc5a5/slc5a9/slc10a4/slc6a6a/slc4a4a/slc12a3/slc5a1/slc12a4/slc10a2/slc23a1/slc6a2/slc6a9/slc6a19a.1/slc5a11/slc20a1a/slc34a1a/slc6a7/mfsd2aa/slc15a2/mfsd2ab/slc2a12/slc13a5b/slc15a1b/slc4a4b/slc13a1/si:ch211-283g2.1/slc26a6l/slc34a1b/slc6a19b/slc2a6/si:ch211-132b12.1/slc12a7b/si:ch211-132b12.3/zgc:158427/slc6a18/slc13a3/slc12a7a/si:dkeyp-9d4.5/slc12a8/slc45a3…	55
GO:0008514	MF	GO:0008514	organic anion transmembrane transporter activity	80/4733	181/17439	5.44E-07	9.89E-05	9.39E-05	slc6a22.2/slc5a8l/slc5a12/slc7a9/slc7a10a/slc10a4/slc38a5a/abcb11a/slc38a7/slc6a6a/slc4a4a/si:dkey-246g23.4/slc16a9a/abcc2/slc38a5b/slc10a2/slc23a1/slc16a12a/slc6a9/slc6a19a.1/slc7a3a/slc25a55a/slc16a10/slc26a5/slc26a1/mfsd2aa/slc19a1/mfsd2ab/slc7a2/zgc:103678/slc35b1/slc13a5b/si:dkey-251i10.1/slc52a3/slc16a4/slc15a1b/slc4a4b/slc16a3/slc13a1/slc38a2/zgc:114041/slc26a6l/slc38a6/slco2b1/slc17a5/slc…	80
GO:0015291	MF	GO:0015291	secondary active transmembrane transporter activity	95/4733	225/17439	6.54E-07	0.000109693	0.000104131	slc6a22.2/si:ch211-225b11.1/slc45a2/slc5a8l/slc5a12/slc5a5/slc5a9/slc24a3/slc8a2a/slc10a4/slc6a6a/slc4a1a/slc4a4a/slc12a3/slc5a1/slc12a4/slc10a2/slc23a1/cax2/slc6a2/slc6a9/slc6a19a.1/clcn5a/slc5a11/slc20a1a/slc1a1/slc9a8/slc16a10/slc26a5/slc4a2a/slc34a1a/slc26a1/slc6a7/mfsd2aa/slc15a2/slc19a1/mfsd2ab/slc2a12/slc13a5b/si:dkey-251i10.1/slc24a2/slc15a1b/slc4a4b/cax1/slc13a1/slc38a2/slc47a1/si:ch211-…	95
GO:0003688	MF	GO:0003688	DNA replication origin binding	16/4733	20/17439	1.27E-06	0.000197472	0.00018746	orc3/cdc6/mcm5/mcm3/mcm6l/mcm3l/orc1/mcm4/cdc45/pola1/mcm10/mcm6/orc6/orc4/mcm7/mcm2	16
GO:0140101	MF	GO:0140101	catalytic activity, acting on a tRNA	50/4733	101/17439	1.36E-06	0.000197472	0.00018746	lcmt2/mtfmt/mettl2a/sars1/trmt61a/trmt1/wars2/ptrhd1/mettl8/lars1b/rpp30/rars2/qrsl1/trmt44/trmt2b/yars1/trmo/tyw3/trmt11/trmt10c/trmt6/qtrt1/rpp21/pars2/dtd1/lrrc47/rars1/nsun2/alkbh8/eprs1/trmt5/tsen15/tyw5/prorp/mettl1/yars2/ptrh2/dus2/si:dkey-85a20.4/dus1l/rpph1/wdr4/tsen2/thumpd2/trmt61b/nars2/dus3l/pop4/trmt9b/trmt13	50
GO:0003678	MF	GO:0003678	DNA helicase activity	30/4733	51/17439	1.93E-06	0.000258862	0.000245738	gins2/ercc6l/ruvbl1/wrnip1/gtf2f2b/gins1/ddx11/si:dkey-97a13.6/gins4/mcm5/pif1/ercc2/mcm3/rad18/mcm6l/mcm3l/mcm4/nbn/cdc45/ruvbl2/mcm6/recql5/brip1/blm/supv3l1/zranb3/actr5/mcm7/mcm2/actr8	30
GO:0004519	MF	GO:0004519	endonuclease activity	45/4733	89/17439	2.17E-06	0.000258862	0.000245738	rnaseh2b/dnase1l1/apex2/dnase1l4.2/fen1/spo11/ercc4/dnase1l4.1/neil1/rnaseh2a/neil3/dnase1l1l/rpp30/rnasel3/rnaset2/piwil1/tsn/rnaseh1/rpp21/elac1/dclre1c/apex1/rag1/pelo/drosha/exo1/dbr1/rnaset2l/pld6/fan1/piwil2/tsen15/mus81/tatdn2/prorp/eme1/si:ch211-165i18.2/dna2/rbbp8l/rpph1/zranb3/tsen2/mrpl44/slx1b/pop4	45
GO:0005342	MF	GO:0005342	organic acid transmembrane transporter activity	63/4733	138/17439	2.26E-06	0.000258862	0.000245738	slc6a22.2/slc5a8l/slc5a12/slc7a9/slc7a10a/slc10a4/slc38a5a/abcb11a/slc38a7/slc6a6a/si:dkey-246g23.4/slc16a9a/slc38a5b/slc10a2/slc23a1/slc16a12a/slc6a9/slc6a19a.1/slc7a3a/slc25a55a/slc16a10/slc26a5/slc26a1/slc19a1/slc7a2/zgc:103678/slc13a5b/slc16a4/slc15a1b/slc16a3/slc13a1/slc38a2/zgc:114041/slc26a6l/slc38a6/slc17a5/slc7a7/slc26a6/slc6a19b/slc43a2b/si:ch211-132b12.1/slc35a4/tmem44/si:ch211-132b12.…	63
GO:0015293	MF	GO:0015293	symporter activity	63/4733	138/17439	2.26E-06	0.000258862	0.000245738	slc6a22.2/si:ch211-225b11.1/slc45a2/slc5a8l/slc5a12/slc5a5/slc5a9/slc10a4/slc6a6a/slc4a4a/slc12a3/slc5a1/slc12a4/slc10a2/slc23a1/slc6a2/slc6a9/slc6a19a.1/slc5a11/slc20a1a/slc1a1/slc34a1a/slc6a7/mfsd2aa/slc15a2/mfsd2ab/slc2a12/slc13a5b/slc15a1b/slc4a4b/slc13a1/slc38a2/si:ch211-283g2.1/slc26a6l/slc34a1b/slc6a19b/slc2a6/si:ch211-132b12.1/slc12a7b/si:ch211-132b12.3/zgc:158427/slc6a18/slc13a3/slc12a7a…	63
GO:0015370	MF	GO:0015370	solute:sodium symporter activity	43/4733	84/17439	2.38E-06	0.000259495	0.000246338	slc6a22.2/si:ch211-225b11.1/slc5a5/slc5a9/slc10a4/slc6a6a/slc4a4a/slc12a3/slc5a1/slc10a2/slc23a1/slc6a2/slc6a9/slc6a19a.1/slc5a11/slc20a1a/slc34a1a/slc6a7/mfsd2aa/mfsd2ab/slc13a5b/slc4a4b/slc13a1/si:ch211-283g2.1/slc26a6l/slc34a1b/slc6a19b/si:ch211-132b12.1/si:ch211-132b12.3/zgc:158427/slc6a18/slc13a3/si:dkeyp-9d4.5/slc13a5a/slc5a3b/slc6a11b/slc6a19a.2/si:ch211-132b12.6/si:ch211-132b12.2/slc6a6b/…	43
GO:0032190	MF	GO:0032190	acrosin binding	11/4733	12/17439	5.26E-06	0.000546398	0.000518696	zp3e/zp3f.1/zp3b/zp3d.1/zp3a.1/zp3a.2/zp3f.2/zpcx/zp3d.2/zgc:173556/zp3c	11
GO:0046943	MF	GO:0046943	carboxylic acid transmembrane transporter activity	61/4733	136/17439	6.55E-06	0.000648581	0.000615698	slc6a22.2/slc5a8l/slc5a12/slc7a9/slc7a10a/slc10a4/slc38a5a/abcb11a/slc38a7/si:dkey-246g23.4/slc16a9a/slc38a5b/slc10a2/slc23a1/slc16a12a/slc6a9/slc6a19a.1/slc7a3a/slc25a55a/slc16a10/slc26a5/slc26a1/slc19a1/slc7a2/zgc:103678/slc13a5b/slc16a4/slc15a1b/slc16a3/slc13a1/slc38a2/zgc:114041/slc26a6l/slc38a6/slc17a5/slc7a7/slc26a6/slc6a19b/slc43a2b/si:ch211-132b12.1/slc35a4/tmem44/si:ch211-132b12.3/zgc:15…	61
GO:0022853	MF	GO:0022853	active ion transmembrane transporter activity	95/4733	237/17439	9.39E-06	0.000890414	0.00084527	slc6a22.2/atp1a1a.4/si:ch211-225b11.1/slc45a2/si:dkey-28b4.8/slc5a8l/atp7a/slc5a12/slc5a5/slc5a9/slc24a3/slc8a2a/slc10a4/slc6a6a/slc4a1a/atp1b1a/slc4a4a/slc12a3/slc5a1/atp6v1e1a/slc12a4/slc10a2/slc23a1/cax2/slc6a2/atp1a3a/slc6a9/slc6a19a.1/clcn5a/slc5a11/slc20a1a/slc9a8/slc26a5/slc4a2a/slc34a1a/atp2a2a/slc26a1/slc6a7/mfsd2aa/slc15a2/slc19a1/mfsd2ab/slc2a12/slc13a5b/atp1a1a.5/si:dkey-251i10.1/atp1…	95
GO:0016893	MF	GO:0016893	endonuclease activity, active with either ribo- or deoxyribonucleic acids and producing 5'-phosphomonoesters	22/4733	35/17439	1.03E-05	0.000931613	0.00088438	rnaseh2b/dnase1l1/dnase1l4.2/fen1/dnase1l4.1/rnaseh2a/dnase1l1l/rpp30/rnaseh1/rpp21/elac1/drosha/exo1/dbr1/fan1/tatdn2/prorp/dna2/rpph1/mrpl44/slx1b/pop4	22
GO:0004536	MF	GO:0004536	deoxyribonuclease activity	27/4733	48/17439	1.97E-05	0.001715907	0.00162891	dnase1l1/apex2/dnase1l4.2/fen1/spo11/ercc4/dnase1l4.1/mgme1/dnase1l1l/pold1/exo5/dclre1c/apex1/rag1/exo1/pole/fan1/mus81/tatdn2/eme1/dna2/rbbp8l/zranb3/dclre1a/si:ch1073-296i8.2/slx1b/eri2	27
GO:0008509	MF	GO:0008509	anion transmembrane transporter activity	111/4733	290/17439	2.07E-05	0.001735225	0.001647248	slc6a22.2/slc5a8l/aqp3a/slc5a12/slc5a5/slc7a9/slc24a3/aqp10a/slc7a10a/slc10a4/slc38a5a/clic2/ttyh2l/abcb11a/slc38a7/pacc1/slc6a6a/slc4a1a/slc4a4a/si:dkey-246g23.4/slc12a3/slc16a9a/abcc2/slc12a4/slc38a5b/slc10a2/slc23a1/mfsd5/slc6a2/slc16a12a/slc6a9/slc6a19a.1/clcn5a/slc7a3a/slc9a8/slc25a55a/slc16a10/slc26a5/clcnk/clic4/slc4a2a/slc26a1/mfsd2aa/lrrc8aa/slc19a1/mfsd2ab/slc7a2/zgc:103678/slc35b1/slc1…	111
GO:0016742	MF	GO:0016742	hydroxymethyl-, formyl- and related transferase activity	8/4733	8/17439	2.93E-05	0.002366677	0.002246686	mtfmt/ftcd/atic/shmt1/aldh1l2/aldh1l1/gart/shmt2	8
GO:0008757	MF	GO:0008757	S-adenosylmethionine-dependent methyltransferase activity	56/4733	128/17439	3.69E-05	0.002871706	0.00272611	kmt2a/gnmt/mettl2a/trmt61a/trmt1/mettl21a/hnmt/pcmt/mettl8/prmt3/icmt/comtb/nsd2/suv39h1a/dnmt1/trmt2b/setd4/prmt9/trmo/ezh1/trmt11/tfb1m/setdb1a/trmt10c/trmt6/nop2/prmt7/mettl16/nsun2/nsd1a/kmt2bb/setd1ba/dot1l/bud23/trmt5/zgc:162780/zgc:162396/prmt6/coq3/mettl14/gamt/ash1l/setmar/kmt2cb/mettl1/si:dkey-85a20.4/kmt2ca/prmt5/wdr4/thumpd2/trmt61b/eed/dph5/ehmt2/kmt5ab/ftsj3	56
GO:0048037	MF	GO:0048037	cofactor binding	170/4733	481/17439	3.87E-05	0.002909179	0.002761683	si:ch73-314g15.3/creg2/phgdh/pygl/tbxas1/cyp11a1/tdh/dohh/dhfr/cyp46a1.2/ppat/rsad2/cyp4t8/gcat/got2b/cyb5r3/gnmt/si:ch73-141c7.1/kmo/cyp2k31/p4ha2/ddx11/sirt2/cyp46a1.1/dhcr24/lancl1/aoc2/acox1/cyp3c1/ddc/sqor/cyba/zgc:136929/mpx/gpt2l/grhprb/aox6/mical2b/zgc:92040/cyp2ad2/cyp2p9/cyp2ad3/kyat1/hao1/zgc:162964/csad/aco1/cyp2u1/slc48a1a/zgc:85777/hmox1a/pold1/zgc:136493/sptlc3/flvcr1/mb/nos2b/cthl…	170
GO:0022804	MF	GO:0022804	active transmembrane transporter activity	126/4733	342/17439	4.79E-05	0.003482463	0.003305901	slc6a22.2/atp1a1a.4/si:ch211-225b11.1/slc45a2/si:dkey-28b4.8/slc5a8l/atp7a/slc5a12/slc5a5/slc5a9/slc24a3/slc8a2a/slc10a4/abcb4/abcb11a/slc6a6a/slc4a1a/atp1b1a/abca2/slc4a4a/slc12a3/slc5a1/abcc2/atp6v1e1a/slc12a4/slc10a2/slc23a1/cax2/abcc9/slc6a2/atp1a3a/slc6a9/slc6a19a.1/clcn5a/slc5a11/slc20a1a/slc1a1/slc9a8/slc16a10/abcb5/slc26a5/slc4a2a/slc34a1a/atp2a2a/slc26a1/slc6a7/mfsd2aa/slc15a2/tap2t/slc1…	126
GO:0004527	MF	GO:0004527	exonuclease activity	32/4733	64/17439	8.17E-05	0.005747042	0.005455666	apex2/smfn/fen1/exd2/mgme1/cnot8/pold1/pde12/zgc:152968/exosc10/rad1/exo5/eri1/dclre1c/apex1/cnot6l/exo1/rad9a/pole/fan1/rad9b/toe1/angel1/noctb/isg20/rexo4/dclre1a/si:ch1073-296i8.2/exd1/parn/exosc4/eri2	32
GO:0005402	MF	GO:0005402	carbohydrate:cation symporter activity	13/4733	18/17439	8.67E-05	0.00590767	0.00560815	slc45a2/slc5a9/slc5a1/slc23a1/slc5a11/slc2a12/slc2a6/si:dkeyp-9d4.5/slc45a3/slc45a4b/slc5a3b/slc2a10/slc5a2	13
GO:0003724	MF	GO:0003724	RNA helicase activity	30/4733	59/17439	9.10E-05	0.006014341	0.005709413	eif4a1b/ddx19/ddx39aa/ddx55/si:dkey-156n14.5/ddx49/tdrd9/mtrex/ddx4/ddx39ab/ddx56/ddx43/ddx51/ddx18/ddx31/ddx39b/dhx29/mov10b.2/ddx28/mov10b.1/ddx20/dhx37/tdrd12/dhx32a/supv3l1/ddx27/dhx38/ddx52/ddx47/ddx54	30
GO:0003697	MF	GO:0003697	single-stranded DNA binding	30/4733	60/17439	0.000135113	0.008663107	0.008223887	rpa3/nabp1a/stn1/nup35/ercc4/mcm5/mcm3/rad18/mcm6l/tdp2b/rpa2/mcm3l/ssbp1/xpc/mcm4/rad51/tsn/cdc45/pola1/mcm10/rad51ap1/ssbp4/polr3c/mcm6/terf1/tdp1/rbbp8l/ssbp2/mcm7/mcm2	30
GO:0015081	MF	GO:0015081	sodium ion transmembrane transporter activity	59/4733	143/17439	0.000172665	0.010754553	0.010209295	slc6a22.2/atp1a1a.4/si:ch211-225b11.1/slc5a5/slc5a9/slc24a3/asic1a/slc8a2a/slc10a4/slc6a6a/atp1b1a/slc4a4a/slc12a3/slc5a1/slc10a2/slc23a1/slc6a2/atp1a3a/slc6a9/slc6a19a.1/slc5a11/slc20a1a/slc9a8/slc34a1a/slc6a7/mfsd2aa/scn4ab/mfsd2ab/slc13a5b/atp1a1a.5/atp1b3b/slc24a2/slc4a4b/slc13a1/si:ch211-283g2.1/slc26a6l/slc34a1b/slc6a19b/slc9a3.1/si:ch211-132b12.1/si:ch211-132b12.3/zgc:158427/slc6a18/slc13a…	59
GO:0030515	MF	GO:0030515	snoRNA binding	11/4733	15/17439	0.000255414	0.015211898	0.014440652	bysl/tsr1/utp25/rrp9/imp4/nhp2/gar1/utp6/nufip1/nop10/nop58	11
GO:0003682	MF	GO:0003682	chromatin binding	84/4733	221/17439	0.000258184	0.015211898	0.014440652	ncor2/noc3l/ncapd2/mtf2/bmi1a/rad21a/supt6h/phf8/tmpoa/stag2a/smarca1/bmi1b/npm1a/klf3/wdhd1/ssrp1b/prdm4/ldb2a/cgas/ing5a/mcm3/klf6a/dnmt1/ncaph2/ncapd3/ncor1/histh1l/cdx4/ssrp1a/egr1/h1-0/orc1/mcm4/setdb1a/rnf169/cdc45/pou5f3/wbp2nl/rnf8/pola1/ticrr/nfatc3b/smarca5/npm2b/h1-10/rel/mcmbp/kdm6bb/atad2b/stag1a/ncaph/kdm6a/ube2t/ing5b/eny2/dnajc2/actl6a/ash1l/mrnip/prdm11/npm2a/asxl2/si:ch211-103n1…	84
GO:0016796	MF	GO:0016796	exonuclease activity, active with either ribo- or deoxyribonucleic acids and producing 5'-phosphomonoesters	22/4733	41/17439	0.000289032	0.016581334	0.015740658	apex2/smfn/mgme1/cnot8/pold1/pde12/exosc10/exo5/eri1/dclre1c/apex1/cnot6l/exo1/pole/toe1/angel1/noctb/isg20/dclre1a/si:ch1073-296i8.2/parn/eri2	22
GO:0005343	MF	GO:0005343	organic acid:sodium symporter activity	17/4733	29/17439	0.000354759	0.019334342	0.018354088	slc6a22.2/slc10a4/slc6a6a/slc10a2/slc23a1/slc6a9/slc13a5b/slc13a1/si:ch211-132b12.1/si:ch211-132b12.3/zgc:158427/slc13a3/slc13a5a/slc6a11b/si:ch211-132b12.6/si:ch211-132b12.2/slc6a6b	17
GO:0071949	MF	GO:0071949	FAD binding	17/4733	29/17439	0.000354759	0.019334342	0.018354088	cyb5r3/kmo/dhcr24/acox1/sqor/aox6/mical2b/zgc:92040/dao.3/dao.2/agps/mmachc/d2hgdh/mical2a/zgc:172341/prodha/mical3a	17
GO:0016705	MF	GO:0016705	oxidoreductase activity, acting on paired donors, with incorporation or reduction of molecular oxygen	74/4733	193/17439	0.000431446	0.022940323	0.021777245	tbxas1/cyp11a1/dohh/cyp46a1.2/cyp4t8/phf8/degs1/kmo/cyp2k31/p4ha2/cyp46a1.1/cyp3c1/kdm7aa/kdm4aa/fads2/pah/mical2b/cyp2ad2/si:dkey-256h2.1/cyp2p9/cyp2ad3/faxdc2/cyp2u1/hmox1a/tph1a/moxd1/nos2b/egln3/p4ha1a/cyp17a1/hspbap1/cyp27a7/ogfod1/cyp21a2/ch25hl2/egln1a/zgc:77439/cyp2k22/cyp11c1/degs2/cyp51/cyp2n13/cyp2p6/cyp2p8/si:dkey-239i20.4/cyp2x7/cyp4f3/cyp17a2/msmo1/tph2/alox5a/plod1a/alkbh8/tet3/alk…	74
GO:0043138	MF	GO:0043138	3'-5' DNA helicase activity	13/4733	20/17439	0.00044253	0.022969414	0.021804861	gins2/gins1/gins4/mcm5/mcm6l/cdc45/mcm6/recql5/blm/actr5/mcm7/mcm2/actr8	13
GO:0015144	MF	GO:0015144	carbohydrate transmembrane transporter activity	20/4733	37/17439	0.000477337	0.024199877	0.02297294	slc45a2/aqp3a/slc5a9/aqp10a/mfsd4ab/slc5a1/slc23a1/slc5a11/aqp1a.1/mfsd4aa/tmem144b/slc2a12/slc2a2/slc2a6/si:dkeyp-9d4.5/slc45a3/slc45a4b/slc5a3b/slc2a10/slc5a2	20
GO:0008408	MF	GO:0008408	3'-5' exonuclease activity	23/4733	45/17439	0.000534902	0.026501941	0.025158289	apex2/smfn/exd2/cnot8/pold1/pde12/exosc10/rad1/eri1/apex1/cnot6l/rad9a/pole/rad9b/toe1/angel1/noctb/isg20/rexo4/si:ch1073-296i8.2/exd1/parn/eri2	23
GO:0050662	MF	GO:0050662	coenzyme binding	91/4733	248/17439	0.000585197	0.028349528	0.026912202	phgdh/pygl/tdh/dhfr/gcat/got2b/cyb5r3/gnmt/kmo/p4ha2/sirt2/dhcr24/acox1/ddc/sqor/zgc:136929/gpt2l/grhprb/aox6/mical2b/zgc:92040/kyat1/hao1/zgc:162964/csad/zgc:85777/zgc:136493/sptlc3/nos2b/cthl/egln3/p4ha1a/etnppl/dao.3/dao.2/ogfod1/gpd1c/aspdh/alas2/egln1a/zgc:77439/gapdhs/gpd1l/agps/gpd1b/si:dkey-239i20.4/mmachc/pcxb/shmt1/pora/mocos/porb/plod1a/h6pd/d2hgdh/foxred2/aifm4/nos1/gfer/marc1/g6pd/sp…	91
GO:0003713	MF	GO:0003713	transcription coactivator activity	49/4733	121/17439	0.000964406	0.045704466	0.043387243	sub1b/nr1d2b/yaf2/ncoa1/phf2/kat6a/lpin1/thrb/ncoa4/sfr1/nr1i2/nr1d4a/pparaa/nr1d1/smarcb1a/rarab/cited4a/arid5b/taf11/cbfb/jun/wbp2nl/sra1/gtf2a2/bcl9l/lpin2/gmeb1/ppargc1a/jund/eny2/jupa/junba/ccar1/kmt2cb/mrtfab/ncoa3/samd11/kmt2ca/pprc1/si:ch73-302a13.2/trip4/nr1h3/zmiz2/si:dkey-68o6.5/ep300a/cited4b/si:dkey-68o6.6/junbb/dr1	49
